# Thermal-metabolic phenotypes of the lizard *Podarcis muralis* differ across elevation, but converge in high elevation hypoxia

Brooke L. Bodensteiner<sup>1,\*</sup>, Eric J. Gangloff<sup>2,3,\*,‡</sup>, Laura Kouyoumdjian<sup>2</sup>, Martha M. Muñoz<sup>1</sup>, Fabien Aubret<sup>2,4</sup>

<sup>1</sup> Department of Ecology and Evolutionary Biology, Yale University 165 Prospect St, New Haven, CT 06511, USA

<sup>2</sup> Station d'Ecologie Théorique et Expérimentale du CNRS – UMR 5321, Moulis, France

<sup>3</sup> Department of Biological Sciences, Ohio Wesleyan University, Delaware, Ohio, USA

<sup>4</sup> School of Molecular and Life Sciences, Curtin University, 6102 WA, Australia

\*Authors contributed equally

‡Author for correspondence: ejgangloff@owu.edu

## Summary Statement

The integrative phenotypes of lizards, including metabolic and thermally-dependent physiological traits, vary between populations at different elevations, but converge in the novel oxygen environment of extreme high elevation.

## Keywords`

Climate warming, Hypoxia adaptation, Metabolic physiology, Multivariate phenotype, Phenotypic plasticity, Thermal physiology

## Abstract

In response to a warming climate, many montane species are shifting upslope to track the emergence of preferred temperatures. Characterizing patterns of variation in metabolic, physiological, and thermal traits along an elevational gradient, and the plastic potential of these traits, is necessary to understand current and future responses to abiotic constraints at high elevations, including limited oxygen availability. We performed a transplant experiment with the upslope-colonizing common wall lizard (*Podarcis muralis*) in which we measured nine aspects of thermal physiology and aerobic capacity in

lizards from replicate low- (400 m above sea level [ASL]) and high-elevation (1700 m ASL) populations. We first measured traits at their elevation of origin and then transplanted half of each group to extreme high elevation (2900 m ASL; above the current elevational range limit of this species), where oxygen availability is reduced by ~25% relative to sea level. After three weeks of acclimation, we again measured these traits in both the transplanted and control groups. The multivariate thermal-metabolic phenotypes of lizards originating from different elevations differed clearly when measured at the elevation of origin. For example, high-elevation lizards are more heat tolerant than low-elevation counterparts (countergradient variation). Yet, these phenotypes converged after exposure to reduced oxygen availability at extreme high elevation, suggesting limited plastic responses under this novel constraint. Our results suggest that high-elevation populations are well-suited to their oxygen environments, but that plasticity in the thermal-metabolic phenotype does not pre-adapt these populations to colonize more hypoxic environments at higher elevations.

## Introduction

To identify how organisms are reacting to rapidly changing environmental conditions we must integrate patterns of interaction among physiology, behavior, and abiotic factors. In addition to evidence for *in situ* adaptation (Bradshaw & Holzapfel 2008; Catullo *et al.* 2019) and plasticity (Charmantier *et al.* 2008; Gunderson & Stillman 2015; Kelly 2019), habitat tracking is a common response (Pauchard *et al.* 2016). As environments warm, species can move toward higher elevations or poleward to track the emergence of their preferred thermal conditions (Dirnböck, Essl & Rabitsch 2011). Movement upslope, however, also presents multiple novel environmental conditions, including varying temperature conditions, changing plant communities, and, of interest for this study, reduced oxygen availability (Storz, Scott & Cheviron 2010; Jacobsen 2020). By examining how behavior and physiology interact in response to changes in both temperature and oxygen availability, we can better anticipate phenotypic shifts and broader biogeographic patterns as global change marches on (Huey *et al.* 2012; Clusella-Trullas & Chown 2014).

A multi-dimensional phenotypic approach is imperative because traits do not evolve or acclimate to environmental variation in isolation (Forsman 2015; Muñoz & Losos 2018; Bodensteiner *et al.* 2021). The thermal dependence of physiological and performance traits is most often characterized with thermal performance curves (TPCs), which describe the relationship between core body temperature and a performance dimension (*e.g.*, sprint speed). From these curves we can extract key parameters, such as

the thermal limits of performance, the optimal temperature for performance, and total thermal breadth of performance (Huey & Stevenson 1979; Taylor *et al.* 2021). The components of the thermal performance curve neither scale linearly across levels of organization (from molecules to organisms), nor are the effects of variation among physiological traits purely additive (Angilletta 2009; Schulte *et al.* 2011). Instead, different parameters of the thermal performance curves and other thermally-dependent traits can shift following a variety of patterns (reviewed in Bodensteiner *et al.* 2021). Some traits, such as thermal preference, optimal sprinting temperature, and heat tolerance, are correlated within individuals in some species, but not others (Van Damme *et al.* 1989; Huey *et al.* 2012). Other traits may evolve independently, such as upper and lower critical limits (Kellermann *et al.* 2012; Muñoz *et al.* 2014, but see Bodensteiner *et al.* 2021). Importantly, thermal traits interact with other physiological pathways (*e.g.*, metabolism and aerobic performance) to maintain whole-organism function (Gangloff & Telemeco 2018; Ern 2019). The thermodynamic effect on molecular processes increases metabolic rate, which can lead to a mismatch between oxygen supply and demand at temperature extremes (Pörtner 2002; Pörtner, Bock & Mark 2017). Correspondingly, interactions among these mechanisms can shape thermal performance and tolerance in a context-dependent fashion (Gangloff & Telemeco 2018). In response to hypoxia, for example, hematological parameters affecting blood-oxygen carrying capacity shift in lizards, impacting both aerobic metabolism and thermal performance (Lu *et al.* 2015; González-Morales *et al.* 2017; Gangloff *et al.* 2019).

We present here an experiment designed to characterize the complex relationships among thermal-metabolic traits within individuals, describe how these traits differ among individuals from populations with different environmental characteristics, and quantify whether and how traits shift in response to novel high-elevation hypoxia exposure. We focus on common wall lizards (*Podarcis muralis*) from replicate populations in different elevational zones. This is a primarily lowland species, with historical populations extending to about 2000 m ASL. Recent observations demonstrate upslope migration, up to 2300 m ASL in the Pyrénées (Pottier 2017; F. Aubret, pers. obs.), with further expansion expected as the environment continues to warm. Upslope colonization, however, will also expose lizards to novel oxygen conditions not experienced in their ancestral range. Given their large population sizes with a high degree of genetic variation (Michaelides *et al.* 2015; Beninde *et al.* 2018) and the range expansions and contractions they've experienced due to shifting climates over their evolutionary history (Gassert *et al.* 2013; Yang *et al.* 2021), we expect *P. muralis* to possess the raw genetic material needed for adaptive responses, thus offering a potential model for characterizing phenotypic pathways in response to changing environments (Kelly 2019). Our study combines field observations and laboratory

experiments to address three primary questions: (1) Do low- and high-elevation lizards differ in their thermal-metabolic phenotypes when measured at their elevation of origin? (2) How do lizards shift thermal-metabolic phenotypes in response to novel hypoxia at extreme high elevation? (3) Do patterns of acclimation in response to captive and novel oxygen conditions differ between low- and high-elevation lizards?

To address these questions, we quantified nine physiological traits: thermal preference ( $T_{\text{PREF}}$ ), selected temperature range ( $T_{\text{SEL}}$ ), critical thermal minimum ( $CT_{\text{MIN}}$ ), critical thermal maximum ( $CT_{\text{MAX}}$ ), haematocrit (packed red blood cell density), haemoglobin concentration, running endurance, resting metabolic rate (RMR), and maximal post-exhaustion metabolic rate (MMR). We predicted that some of these traits will differ between lizards inhabiting different elevations when measured at their elevation of origin and some traits will shift in response to novel oxygen conditions (see detailed trait-specific predictions in **Table 1**). We additionally describe phenotypes in multivariate space and test for differences between groups, predicting that lizards from high elevation, which are pre-exposed to moderate levels of hypoxia, will shift less under exposure to more extreme oxygen reduction. We also estimate thermoregulatory patterns for lizards at both elevations, and predict that lizards at high-elevation will be more effective thermoregulators to compensate for their colder habitats (Caldwell, While & Wapstra 2017; Ortega & Martín-Vallejo 2019). Our study quantifies spatial variation in trait expression and plastic potential of traits in the ecological context of range expansion. Given that traits interact within individuals and that different trait combinations can lead to the same functional outcome, such a multivariate approach is essential in leveraging trait-based approaches to predict patterns at broader scales (Beissinger & Riddell 2021).

## Methods

### *Lizard collection and husbandry*

This experiment used adult male common wall lizards (Lacertidae: *Podarcis muralis* Laurenti 1768) from within their ancestral elevational range in the Departments of Ariège and Hautes-Pyrénées in southern France. We used a small lasso attached to an extendible pole to collect animals from low-elevation populations (425-473 m ASL; N = 25) on 3-4 September 2018 and from high-elevation populations (1557-1812 m ASL; N = 24) on 10-11 September 2018 (see **Table S1** for sample size details). On the day of capture, we weighed lizards using a digital scale (AMIR, China,  $\pm 0.01$  g; range: 3.18-8.50; mean: 5.75) and measured snout-vent length using digital calipers (CD-6, Mitutoyo, Japan;

SVL  $\pm 0.01$  mm; range: 50.90-68.42; mean: 60.21). Lizards from low- and high-elevation populations did not differ in mass ( $t_{95.4} = -0.83$ ,  $P = 0.410$ ) but lizards from low-elevation were ~4% larger in SVL (low elevation mean: 61.42 mm; high elevation mean: 58.96 mm;  $t_{86.6} = -3.23$ ,  $P = 0.002$ ). The day of capture, we transported animals to a laboratory at approximately the same elevation, either low-elevation (436 m ASL) or high-elevation (1735 m ASL, **Table S1**). Lizards were maintained under common conditions in each lab in groups of 3-6 individuals in plastic enclosures, with water provided *ad libitum*, and a basking platform that also served as a shelter. Ambient temperature varied between 15°C to 20°C and light was provided 14 h d<sup>-1</sup> with fluorescent bulbs. During daytime hours, incandescent heat bulbs supplied a temperature gradient of ca. 25-40°C for 6 h d<sup>-1</sup> at 1-h intervals.

### *Experimental design*

After 2-3 days of acclimation, we began experiments at the elevation of origin. Lizards were not fed until after the first set of measurements to ensure a postabsorptive state (Van Damme, Bauwens & Verheyen 1991; Pafilis *et al.* 2007). We conducted measures on two consecutive days, fed and fasted lizards again, and then completed measures over several days to ensure that animals would be nourished, but postabsorptive, during measurements. All trials were conducted during daylight hours (9h30-20h00). Within each elevation cohort, we divided lizards into three groups and conducted a single assay of thermal physiology or performance on a given day: 1) thermal preference trial, 2) critical thermal maximum, 3) critical thermal minimum 4) resting metabolic rate, running endurance, and maximum post-exhaustion metabolic rate (as in Gangloff *et al.* 2019). Because of time constraints, only a subgroup of lizards could be measured for metabolic rates and endurance (**Tables S1 and S2**).

After initial measures, lizards were divided randomly into two treatment groups within each elevation cohort: one treatment remained at the elevation of origin to serve as a control and one treatment was transported to the Observatoire Pic du Midi de Bigorre at extreme high elevation, currently above the range limit of *P. muralis* (2877 m ASL; **Table S1**; Pottier 2017). Lizards in the two treatment groups did not differ in size within either elevation cohort (low elevation:  $t_{47.5} = -1.33$ ,  $P = 0.19$ ; high elevation:  $t_{44.9} = 0.87$ ,  $P = 0.39$ ). Lizards were maintained under standard husbandry conditions at low, high, or extreme high elevation for 15-27 days and then all traits were re-measured. Previous work demonstrates that, within three weeks of transplantation to extreme high elevation, adult male lizards exhibit changes in blood biochemistry, sprint performance, running endurance, maximal post-exhaustive metabolic rates, and body condition (Gangloff *et al.* 2019). Our experimental design thus allows a test for differences between lizards from low- and high-elevation populations tested at their elevation of origin, changes in

thermal biology over time in captivity, and plastic responses in lizards originating from different elevations to extreme high elevation. Following experiments, all animals were returned to their site of capture.

### *Critical thermal limits*

To measure core body temperature during the thermal tolerance experiments, a temperature probe (Type T, 36 gauge, Omega Engineering, USA,  $\pm 0.1^\circ\text{C}$ ) connected to a digital temperature logger (HH806AU; Omega) was placed approximately 1 cm into the cloaca of each lizard and secured with medical tape. Lizards were placed in a plastic container in which they could move freely and acclimate to room temperature ( $\sim 20^\circ\text{C}$ ). The plastic container was then placed into a polystyrene foam cooler layered with ice (for  $\text{CT}_{\text{MIN}}$  trials) or heated with a 100-watt light bulb (for  $\text{CT}_{\text{MAX}}$  trials). The lizard was then systematically cooled or warmed by  $\sim 1^\circ\text{C}/\text{min}$ . Once the lizard reached  $15^\circ\text{C}$  (for  $\text{CT}_{\text{MIN}}$  trials) or reached the panting threshold (Hertz *et al.* 1979) or  $30^\circ\text{C}$  (for  $\text{CT}_{\text{MAX}}$  trials), it was flipped onto its back and stimulated to right itself by prodding at the base of its tail and thighs with blunt tweezers. The flipping procedure was repeated every  $0.5^\circ\text{C}$  change in temperature until the lizard was unable to right itself after 15 seconds, with that temperature being defined as  $\text{CT}_{\text{MIN}}$  and  $\text{CT}_{\text{MAX}}$ .

### *Thermal preference trials*

We estimated the preferred body temperature ( $T_{\text{PREF}}$ ) and the preferred temperature range or the set-point range ( $T_{\text{SEL}}$ ) by placing lizards within a laboratory thermal gradient during the lizards' active hours (Taylor *et al.* 2021).  $T_{\text{SEL}}$  refers to the range of the central 50% of body temperatures (interquartile range) measured from lizards that have been placed in a thermal gradient and allowed to choose where to sit, and  $T_{\text{PREF}}$  is the mean of this range (Huey 1982; Hertz, Huey & Stevenson 1993; Taylor *et al.* 2021). The thermal preference arenas were constructed from smooth corrugated plastic ( $91\text{ cm} \times 60\text{ cm} \times 39\text{ cm}$ ) with four identical lanes in each arena. We created a stable thermal gradient ( $20^\circ\text{C}$ - $40^\circ\text{C}$ ) with two ceramic heating bulbs. Lizards acclimated in the arena for 30 minutes before we recorded core body temperature every 5 minutes for three hours with a thermocouple (40-gauge) that was inserted into the cloaca following the above protocol (Muñoz & Losos 2018).

### *Metabolic rates and running endurance*

We measured resting metabolic rate (RMR), running endurance, and maximal post-exhaustion metabolic rate consecutively in a subset of animals from one population at each elevation (**Tables S1 and S2**). Lizards were first placed in 250 mL opaque plastic metabolic chamber and acclimated to  $32^\circ\text{C}$

(approximating the mean of field body temperatures recorded in this study and within the preferred temperature range of this species in this region, Trochet et al. 2018) in an incubator (ExoTerra Model PT-2445, Hagen Inc., Canada) for 30 min. We then utilized pull-mode respirometry to continuously measure gas exchange for 30 min using a Foxbox-C Field O<sub>2</sub> and CO<sub>2</sub> Analysis System (Sable Systems, Inc., USA). Air was circulated at a rate of 500 mL min<sup>-1</sup> through the metabolic chamber, dried of water vapor with Drierite (Hammond, USA), and then measured for both O<sub>2</sub> and CO<sub>2</sub> content, corrected for barometric pressure. We calculated oxygen consumption [ $\dot{V}\text{O}_2$ ] and carbon dioxide production [ $\dot{V}\text{CO}_2$ ] following the equations of Lighton (2008) and extracted the lowest values averaged over a 10-minute window for our value of RMR (as in Kouyoumdjian *et al.* 2019) using ExpeData software (v. 1.7.30, Sable Systems, Inc.). After measuring RMR, we ran lizards to exhaustion in a sand-lined arena (82 × 31 cm) that was kept warm (~35–38°C) with submerged heating cables to maintain lizard body temperature near the preferred value. One of us (EJG) continuously chased the lizard with a soft paintbrush until further stimulation elicited no locomotor response for 5 seconds (Gleeson & Dalessio 1989; Gangloff *et al.* 2019). Time (s) from the start of trial to exhaustion, recorded with a stopwatch, was the measure of running endurance. Immediately after (within 10 s), we replaced lizards in a metabolic chamber and measured gas exchange for an additional 10 min. We extracted the highest rates of gas exchange over a 15 s interval as our measure of maximal post-exhaustion metabolic rate ( $\dot{V}\text{CO}_{2\text{peak}}$ ), excluding readings for the first 3 min to account for the time required to flush a chamber of this size at this flow rate. Measurement of gas exchange would ideally commence instantaneously; our protocol nonetheless captures the peak or near-peak in post-exercise aerobic metabolic rate (Hailey, Gaitanaki & Loumbourdis 1987; Gangloff *et al.* 2019), which represents an important aspect of the energetic costs of locomotor activity (Gleeson & Hancock 2002). Analysis of  $\dot{V}\text{CO}_2$  and  $\dot{V}\text{O}_2$  did not qualitatively differ; because our readings for CO<sub>2</sub> were consistently more reliable than for O<sub>2</sub> (due to sensor drift), we present data on  $\dot{V}\text{CO}_2$  only.

#### *Blood sampling and hematological measures*

At the time of capture and then again during the second measurement period, we collected blood samples (25–30 µL) from the retro-orbital sinus using a heparinized glass capillary tube (MacLean, Lee & Wilson 1973), which was then stored on ice until processing. We quantified hematocrit and haemoglobin concentration following Gangloff et al. (2019). We measured haemoglobin in samples run in duplicate on three plates, with each plate including a pooled sample to provide estimates of intra- and inter-plate variation (CV of 5.4% and 9.1%, respectively).



### *Operative and body temperature measurements*

The operative temperature ( $T_e$ ) is the stable temperature of an organism when they are not behaviorally thermoregulating (Bakken 1992). We deployed 20 electroform copper lizard models containing an iButton temperature logger (Model DS1921G-F5, Maxim Integrated) at one low and one high elevation site following Muñoz *et al.* (2014). Copper models were placed haphazardly in the environment (excluding roads and waterways) the night before sampling and perches were targeted to include microhabitats observed to be occupied by lizards from this and previous sampling efforts. Models recorded temperatures every ten minutes (07h00-19h00) on sampling days. Copper model accuracy was assessed by measuring the equilibrium temperature of models and a lizard carcass across a relevant range of temperatures (15-35°C in 5°C increments). Thermocouples were attached inside the model and inside the lizard's cloaca. We then allowed both to equilibrate at each temperature (~1.5 hours) in a programmed incubator. We then used the equation from a regression of lizard temperature on the model temperature ( $R^2 = 0.998$ ;  $y = 0.779x + 5.008$ ) to correct recorded field temperatures from the copper models. On 4 September 2018 (Aubert, low-elevation) and 11 September 2018 (La Mongie, high-elevation) we sampled field body temperature ( $T_b$ ) during daylight hours. Lizards were captured via methods detailed above and a  $T_b$  measure was taken by rapidly inserting a thermocouple connected to a digital thermometer (Omega HH801) ~1 cm into the lizard's cloaca. We identified sex via external morphology and marked lizards before release with non-toxic paint to prevent resampling. We used a  $t$ -test to compare  $T_b$  between low- and high-elevation lizards.

### *Thermoregulatory efficiency*

We calculated thermoregulatory efficiency ( $E$ ) for adult lizards at one low- and one high-elevation field site (**Table S5**) using the equation of Hertz *et al.* (1993):

$$E = 1 - \bar{d}_b / \bar{d}_e \quad \text{Eq. 1}$$

where  $\bar{d}_b$  and  $\bar{d}_e$  denote the mean deviation of  $T_b$  and  $T_e$  from  $T_{SEL}$ , respectively. Values of  $E$  approaching 1 indicate effective thermoregulation (lizards maintain temperatures within their preferred ranges, regardless of local thermal environment), whereas values of  $E$  closer to 0 indicate behavioral passivity with respect to temperature (*i.e.*, thermoconformity; Hertz *et al.* 1993). We estimated 95% confidence intervals for  $E$  through bootstrap resampling of our empirical distributions of  $T_e$  and  $T_b$  for each population (Muñoz and Losos 2018).



### *Univariate statistical methods*

We utilized linear mixed models to assess the relative influence of origin elevation, response to captive conditions, and response to translocation on nine dependent variables:  $T_{\text{PREF}}$ ,  $T_{\text{SEL}}$ ,  $CT_{\text{MIN}}$ ,  $CT_{\text{MAX}}$ , haematocrit, haemoglobin concentration, running endurance, resting metabolic rate (RMR,  $\dot{V}\text{CO}_2$ ), maximal post-exhaustion metabolic rate (MMR,  $\dot{V}\text{CO}_{2\text{peak}}$ ). Models included a single categorical factor comprised of six levels, with levels describing the combination of elevation of origin (low- vs. high-elevation), test location (elevation of origin vs. extreme high elevation), and timepoint (first or second measure). We then tested our specific *a priori* hypotheses using linear contrasts of estimated marginal means using the *emmeans* package (Lenth *et al.* 2018), correcting for multiple comparisons with the Šidák method (see **Table S2**). Because our experiment was designed to first test all lizards at their elevation of origin and then the response to translocation, we did not have a full-factorial design. This modeling approach, therefore, decreases the number of parameters estimated and allows tests of our hypotheses. We included a random intercept for each individual and included a covariate of body size (mass for MR measures, SVL for all other dependent variables). If this covariate was not an important predictor ( $P > 0.10$ ), we removed this from final models. To meet the assumption of normally-distributed residuals, we  $\log_{10}$ -transformed  $T_{\text{SEL}}$  and endurance before analysis. Models were implemented with the lme4 package (Bates *et al.* 2015) in R (R Core Team 2018). We visually assessed distributions of model residuals and determined the relative importance of fixed effects using type III sums of squares with corrected denominator degrees of freedom (Kenward & Roger 1997). All data figures were created with ggplot2 (Wickham 2011).

### *Multivariate statistical methods*

We analyzed the multivariate phenotype in a unified analysis that allowed us to simultaneously quantify the within-individual correlations of traits, differences in traits among lizards from different elevations, and shifts in phenotype in response to the hypoxia of extreme high elevation. We included in this analysis the same nine traits listed above, made on individuals from a single low- and high-elevation population at both their elevation of origin and at extreme high elevation. As in the univariate analyses,  $T_{\text{SEL}}$  and endurance were  $\log_{10}$ -transformed before analysis. For measures of RMR and MMR, we calculated the rate of oxygen consumption per gram and then  $\log_{10}$ -transformed these values before analysis. We utilized a nonparametric multivariate analysis of variance (NP-MANOVA) with residual randomization in permutation procedure (RRPP; Collyer & Adams 2018), implemented in R (R Core Team 2018) and following Telemeco & Gangloff (2020). Because this approach requires a complete data set (all measures for all individuals at a given measurement time), we included only those

individuals for which we measured metabolic rates (see above; 46 measures of 9 variables on 23 individuals; **Table S1**). We were missing 6.3% (26 of 414) of individual trait measures. Following the guidelines of Telemeco and Gangloff (2020), we imputed these values using multiple regression models including all other measured traits. We then created a model that included a categorical factor combining elevation of origin, test location, and timepoint to compare the multidimensional phenotype among different groups, with significance determined from 999 iterations of the residual randomization procedure. We extracted least-squares means in multidimensional space to compare phenotypes among groups, conducted pairwise tests for differences in all group combinations, and extracted least-squares means and 95% confidence intervals for each of the traits included in the multivariate response matrix.

## Results

### *Univariate Analyses*

$T_{\text{PREF}}$ ,  $T_{\text{SEL}}$ , and  $CT_{\text{MIN}}$  did not differ between treatment groups and we found no evidence of shifts in these traits in response to novel oxygen conditions (**Table S2, Fig. S1**). When combining measurements made at both time points, lizards from high elevation were 2.7°C more heat tolerant than lizards from low elevation (**Table S2, Figs. 1A, S1C**). Haematocrit decreased across time in lizards kept at elevation of origin and was higher at the second timepoint in lizards transplanted to extreme high elevation compared to lizards kept at their elevation of origin (**Table S2, Figs. 1B, S1D**). Haemoglobin concentration demonstrated similar, though non-significant, trends across time and in response to transplant to extreme high elevation (**Table S2, Fig. S1E**). Running endurance decreased during time in captivity for lizards kept at their elevation of origin, a result mostly driven by lizards originating from high elevation (**Fig. S1G**). Larger lizards had high RMR, but RMR did not differ among measurement groups (**Table S2, Fig. S1H**). Mass also positively influenced MMR and these measures differed among measurement groups. When measured at their elevation of origin and when combining all measurements made at both time points, low-elevation lizards exhibited higher MMRs compared to high-elevation lizards (**Table S2, Fig. 2C, S1I**).

### *Multivariate analysis*

The NP-MANOVA with RRPP demonstrates that the multivariate thermal-metabolic phenotype clearly differs among measurement groups (**Fig. 2**,  $F_{5,40} = 2.4$ ,  $P = 0.001$ ). Lizards from both low- and high-elevation populations shifted phenotypes in response to captivity, even when held at their elevation of origin (Low-elevation:  $P = 0.013$ ; High-elevation:  $P = 0.003$ ), driven primarily by decreases in both

haematocrit levels and running endurance (**Table 2**). Transplanting lizards to extreme high elevation altered the thermal-metabolic phenotype in low-elevation lizards ( $P = 0.046$ ), but not high-elevation lizards ( $P = 0.146$ ), primarily driven by increases in haematocrit levels and haemoglobin concentration (**Table 2**). Multivariate phenotypes of lizards transplanted to extreme high elevation did not differ in lizards originating from low- or high-elevations ( $P = 0.273$ ; **Table S3**). Least-squares means of individual traits corroborate our univariate analyses (**Fig. 3, Table S4**).

#### *Field body temperature & thermoregulatory efficiency*

We measured body temperatures in  $N = 90$  low-elevation and  $N = 111$  high-elevation lizards. Low-elevation lizards exhibited higher  $T_b$  compared with high elevation lizards ( $32.5^\circ\text{C}$  vs.  $29.9^\circ\text{C}$ ;  $t_{193.4} = 5.56$ ,  $P < 0.001$ ; **Table S5, Fig. 4**). However, thermoregulatory efficiency did not differ between the groups (**Table S5**). As values of  $d_b$  and  $d_e$  increase, both thermoregulatory accuracy and thermal quality of the environment decrease, respectively. For example, the  $d_e$  values between our high and low elevation sites only differed by 0.15, indicating relatively little difference in thermal environments available on the sampled days.

## **Discussion**

The interdependence of physiological traits, and their complex interaction with different environmental variables, challenges our ability to predict phenotypic responses in changing or novel environments and, by extension, the effects at a biogeographical scale (Beissinger & Riddell 2021). Our study serves to quantify important spatial variation in multivariate trait expression and the plastic potential of these traits in a novel environment that may be soon colonized by a montane vertebrate. Whereas lizards from low- and high-elevation sites occupy distinct regions of trait space when measured at the elevation of origin, they converged in trait space under acute exposure to a novel oxygen environment (**Fig. 2**). Lizards from both low- and high-elevation populations exhibited plastic shifts in the multivariate thermal-metabolic phenotype in response to captive conditions, with low-elevation lizards changing more dramatically than high-elevation lizards in response to novel conditions of reduced oxygen availability (**Figs. 2, 3**). Aerobic capacity, an important determinant of behaviors and fitness (Gangloff & Telemeco 2018; Seibel & Deutsch 2020), is nonetheless limited in novel low-oxygen conditions (**Table S2, Fig. 1C**). This suggests that shifts blood composition pertinent to oxygen transport – increases in haemoglobin concentration and haematocrit – only partially compensate for reduced oxygen availability. Describing this variation in phenotypic expression, especially the structure of trait

correlation in the multidimensional thermal-metabolic phenotype, is a necessary first step in relating phenotypic expression to broader biogeographical patterns. Future work should be directed toward uncovering the genetic and physiological pathways that create these patterns of phenotypic variation and relating these underlying mechanisms to response potential.

To understand the potential for phenotypic change in response to novel conditions we must first characterize existing physiological variation between populations. In our experiment, we found that critical thermal limits and thermal preferences were insensitive to variation in oxygen availability across an elevational gradient (**Table S2**). Nonetheless, we detected differences in  $CT_{MAX}$  and MMR between lizards measured at their elevations of origin. Our results of lower MMR but no effect of reduced oxygen availability in high-elevation lizards may indicate that the “starting point” of physiological traits (*i.e.*, due to local adaptation, developmental plasticity, or other processes linked to population of origin that may lead to differentiation) may impact the trajectory of plastic response in these physiological phenotypes (West-Eberhard 2003; Aubret & Shine 2010, Phillips et al. 2016). In this case, individuals from the high elevation populations exhibit MMR intermediate to those of lizards measured at low- and extreme high-elevation, suggesting that the variation observed may be the result of immediate oxygen environment. Thermal tolerance limits were not affected by the reduction of oxygen availability found at our extreme high elevation treatment; correspondingly, these traits are unlikely to be oxygen limited as *P. muralis* tracks habitat upslope (Gangloff & Telemeco 2018). Additionally, we found that high-elevation lizards are more heat tolerant than their low-elevation counterparts, a pattern documented in other lizard taxa (Llewelyn *et al.* 2016; Hodgson & Schwanz 2019). The ‘hotter is better’ hypothesis supplies a compelling explanation for this countergradient pattern (Angilletta, Huey & Frazier 2010). Biochemical reactions accelerate as temperature increases (until an upper limit is reached) and, correspondingly, maximum performance, growth, and metabolism should increase with higher body temperatures (Hamilton 1973; Huey & Bennett 1987). Counter-gradient variation (Conover & Schultz 1995; Pettersen 2020) in upper physiological limits, as we observed here, may be attributable to a greater basking need to compensate for limited thermal resources (Michniewicz & Aubret 2010; Hodgson & Schwanz 2019). This compensation may drive thermal physiological and behavioral evolution for increased thermal limits and preferences in cold climate reptiles relative to warm climate reptiles (Hertz & Huey 1981; Huey *et al.* 2009; Llewelyn *et al.* 2017).

A wide variety of vertebrates, including humans, demonstrate shifts in haematocrit and haemoglobin concentration in response to short-term (days, weeks) exposure to hypoxic environments (Storz, Scott & Cheviron 2010; Schlittler *et al.* 2020). This response increases oxygen diffusion and perfusion capacity by increasing the concentration of substrate in the blood to which oxygen can bind. This response, however, carries a physiological cost due to increased blood viscosity (Birchard 1997; Dunlap 2006). Previous work with *P. muralis* demonstrated that adult lowland lizards from both sexes increased haematocrit and haemoglobin concentration in response to both moderate and more extreme hypoxia (Gangloff *et al.* 2019; Kouyoumdjian *et al.* 2019). Notably, however, this shift was not sustained in the longer-term (six weeks) and did not sufficiently compensate performance decrements (Gangloff *et al.* 2019). Similarly, lizards in the present study exhibited plastic shifts in these blood parameters related to oxygen-carrying capacity, but in this case did not suffer decrement in running endurance or maximum metabolic rate at extreme high elevation. Further, running endurance and these blood parameters are correlated on the first axis of variation in the thermal-metabolic phenotype, suggesting a functional link. Plasticity in blood parameters, therefore, may be able to compensate for reduced oxygen availability, but only on relatively short time scales (several weeks) and, even then, only partially. This finding aligns with previous work showing that such short-term shifts in response to oxygen environments can be maladaptive in the long-term (reviewed in Storz, Scott & Cheviron 2010; Storz 2021). In further support of this, we found no differences in haematocrit or haemoglobin concentration from low- and high-elevation lizards, or in the plastic response of these measures. While this plastic response might be beneficial for individual animals under brief exposure, it is unlikely to facilitate range expansion and colonization of higher-elevation habitat (Hoffmann & Sgro 2011; Munday, Donelson & Domingos 2017; Catullo *et al.* 2019; Kelly 2019). Nonetheless, haematocrit and running endurance acclimated in response to time in captivity, even at the elevation of origin (**Table S2, Figs. S4, S7**), similar to effects found previously with this species (Gangloff *et al.* 2019). Our findings shine light on the importance of repeated measures and accounting for potential trait change of organisms while in captivity, even under consistent common garden conditions.

A multivariate approach to characterizing phenotypes can reveal important patterns of differentiation between populations and the response to specific environmental conditions. For example, Swaegers, Spanier and Stoks (2020) described the transcriptomic response of damselflies (*Ischnura elegans*) from different latitudes in response to cool and warm temperatures. They found that the first and second axes of variation in whole-body RNA abundance described local adaptation and response to immediate temperature, respectively. Our multivariate approach similarly revealed important patterns not evident

from the univariate analyses alone. Most clearly, we observed a separation of lizards from low- and high-elevation populations along the second axis of variation (**Fig. 2**). Importantly, these differences are consistent in measures made at the initial timepoint and those made after several weeks in captivity. This axis of variation most strongly contrasts lizards with different post-exhaustion maximal metabolic rates, consistent with our univariate results (**Table S2, Fig. 1A**). This difference in trait values may be due to either genetically canalized differences, developmental differences in response to environmental cues, or the differences in the immediate conditions experienced during measurement. A reciprocal transplant experiment (measuring low-elevation lizards at high elevation and vice-versa) is necessary to determine the relative influences of immediate environmental constraints and permanent mechanisms such as developmental plasticity or genetic differentiation. Selected temperature range also loads moderately high on this second axis of variation, potentially suggesting co-adaptation of thermoregulatory behavior and physiology, resulting in a narrowing of the thermal performance curve (Angilletta 2009).

Whereas the second axis of variation in the multivariate phenotype clearly separates lizards originating from different elevations and measured at their elevation of origin, the first axis describes plastic responses to captivity. Most strongly, levels of haematocrit were reduced across time in captivity in animals kept at their native elevation. Running endurance also loaded moderately on the first axis, demonstrating that time in captivity reduces running endurance. In this case, changes in diet composition and water availability in captivity relative to the wild may have caused shifts in blood parameters, activity levels, and performance, even as lizards were kept at the same elevation. Physiological phenotypes of lizards from both low- and high-elevation populations converged at extreme high elevation, suggesting a common response to this novel condition. Shifts in multivariate space in response to the novel oxygen environment occur along both the primary and secondary axes of variation. This belies simple interpretation of these axes as describing differences between populations (as due to local adaptation or developmental differences) and within-individual shifts in traits (plasticity). That the multivariate phenotypes emerging in response to this novel condition did not differ in lizards originating from different elevations suggests that populations currently at high elevations – even those approaching the observed limit for the species in this area (Pottier 2017) – are not necessarily more capable of dealing with these potential abiotic restrictions. This result in adult lizards parallels that observed in earlier life stages, specifically that developing embryos from low- and high-elevation *P. muralis* dams did not differ in their response to extreme-high elevation (Kouyoumdjian *et al.* 2019). Future work directed toward determining whether the observed shifts in the thermal-metabolic phenotype are the result of immediate environmental constraints or active plasticity is crucial to determine fitness



consequences and assess colonization potential (Forsman 2015). Our results underscore the value of determining the patterns of variation in the multivariate phenotype among populations and potential plastic shifts in response to novel environmental conditions as an essential first step in predicting phenotypic responses and biogeographic shifts resulting from ongoing climate changes.

## Acknowledgements

The authors are grateful to J. Souchet, A. Josserand, E. Darnet, H. Le Chevalier, and The Dø for field and logistical support. We thank the Observatoire Midi-Pyrénées staff at Pic du Midi and Y. Ardrit for their hospitality. This work was supported by the “Laboratoire d’Excellence (LABEX)” TULIP (ANR-10-LABX-41), the INTERREG POCTEFA ECTOPYR (no. EFA031/15), and the European Union’s Horizon 2020 research and innovation programme under the Marie Skłodowska-Curie grant agreement No 752299. BLB was supported by the American Philosophical Society: Lewis and Clark Fund for Exploration and Field Research and a Travelling Fellowship from the Company of Biologists (JEBTF-180219). Field and lab protocols were conducted under permit from the Direction régionale de l’environnement, de l’aménagement et du logement Midi-Pyrénées (Arrêté Préfectoral No: 2017-s-02 du 30 mars 2017), under current ethical committee approval (APAFIS#16359), and in accordance with Directive 2010/63/EU. Lizard carcass used for copper model validation was from Ohio, USA, under Ohio Division of Wildlife Wild Animal Permit (23-014) and Ohio Wesleyan University IACUC (protocol Spring\_2020-21-04\_Gangloff\_B).

## Data Availability Statement

Upon acceptance, data will be deposited in Dryad Data Repository.

No competing interests declared.

## Literature Cited

- Angilletta, M.J. (2009) *Thermal Adaptation: A Theoretical and Empirical Synthesis*. Oxford University Press, USA.
- Angilletta, M.J., Huey, R.B. & Frazier, M.R. (2010) Thermodynamic effects on organismal performance: is hotter better? *Physiological and Biochemical Zoology*, **83**, 197-206.
- Aubret, F. & Shine, R. (2010) Fitness costs may explain the post-colonisation erosion of phenotypic plasticity. *Journal of Experimental Biology*, **213**, 735-739.
- Bakken, G.S. (1992) Measurement and application of operative and standard operative temperatures in ecology. *American Zoologist*, **32**, 194-216.
- Bates, D., Mächler, M., Bolker, B. & Walker, S. (2015) Fitting linear mixed-effects models using lme4. *Journal of Statistical Software*, **67**, 1-48.



- Beissinger, S.R., Riddell, E.A. (2021) Why are species' traits weak predictors of range shifts? *Annual Review of Ecology, Evolution, and Systematics*, **52**, 47-66.
- Beninde, J., Feldmeier, S., Veith, M. & Hochkirch, A. (2018) Admixture of hybrid swarms of native and introduced lizards in cities is determined by the cityscape structure and invasion history. *Proceedings of the Royal Society B*, **285**, 20180143.
- Birchard, G.F. (1997) Optimal hematocrit: theory, regulation and implications. *American Zoologist*, **37**, 65-72.
- Bodensteiner, B.L., Agudelo-Cantero, G.A., Arietta, A.Z.A., Gunderson, A.R., Muñoz, M.M., Refsnider, J.M. & Gangloff, E.J. (2021) Thermal adaptation revisited: How conserved are thermal traits of reptiles and amphibians? *Journal of Experimental Zoology A*.
- Bradshaw, W. & Holzapfel, C. (2008) Genetic response to rapid climate change: it's seasonal timing that matters. *Molecular ecology*, **17**, 157-166.
- Caldwell, A.J., While, G.M. & Wapstra, E. (2017) Plasticity of thermoregulatory behaviour in response to the thermal environment by widespread and alpine reptile species. *Animal Behaviour*, **132**, 217-227.
- Catullo, R.A., Llewelyn, J., Phillips, B.L. & Moritz, C.C. (2019) The potential for rapid evolution under anthropogenic climate change. *Current Biology*, **29**, R996-R1007.
- Charmantier, A., McCleery, R.H., Cole, L.R., Perrins, C., Kruuk, L.E. & Sheldon, B.C. (2008) Adaptive phenotypic plasticity in response to climate change in a wild bird population. *Science*, **320**, 800-803.
- Clusella-Trullas, S. & Chown, S.L. (2014) Lizard thermal trait variation at multiple scales: a review. *Journal of Comparative Physiology B*, **184**, 5-21.
- Collyer, M.L. & Adams, D.C. (2018) RRPP: An R package for fitting linear models to high-dimensional data using residual randomization. *Methods in Ecology and Evolution*, **9**, 1772-1779.
- Conover, D.O. & Schultz, E.T. (1995) Phenotypic similarity and the evolutionary significance of countergradient variation. *Trends in Ecology & Evolution*, **10**, 248-252.
- Dirnböck, T., Essl, F. & Rabitsch, W. (2011) Disproportional risk for habitat loss of high-altitude endemic species under climate change. *Global Change Biology*, **17**, 990-996.
- Dunlap, K.D. (2006) Ontogeny and scaling of hematocrit and blood viscosity in Western Fence Lizards, *Sceloporus occidentalis*. *Copeia*, **2006**, 535-538.
- Ern, R. (2019) A mechanistic oxygen-and temperature-limited metabolic niche framework. *Philosophical Transactions of the Royal Society B*, **374**, 20180540.
- Forsman, A. (2015) Rethinking phenotypic plasticity and its consequences for individuals, populations and species. *Heredity*, **115**, 276-284.
- Gangloff, E.J., Sorlin, M., Cordero, G.A., Souchet, J. & Aubret, F. (2019) Lizards at the peak: Physiological plasticity does not maintain performance in lizards transplanted to high altitude. *Physiological and Biochemical Zoology*, **92**, 189-200.
- Gangloff, E.J. & Telemeco, R.S. (2018) High temperature, oxygen, and performance: Insights from reptiles and amphibians. *Integrative and Comparative Biology*, **58**, 9-24.
- Gassert, F., Schulte, U., Husemann, M., Ulrich, W., Rödder, D., Hochkirch, A., Engel, E., Meyer, J., Habel, J.C. & Parmakelis, A. (2013) From southern refugia to the northern range margin: genetic population structure of the common wall lizard, *Podarcis muralis*. *Journal of Biogeography*, **40**, 1475-1489.
- Gilbert, A.L. & Miles, D.B. (2019) Spatiotemporal variation in thermal niches suggests lability rather than conservatism of thermal physiology along an environmental gradient. *Biological Journal of the Linnean Society*, **128**, 263-277.
- Gleeson, T.T. & Dalessio, P.M. (1989) Lactate and glycogen metabolism in the lizard *Dipsosaurus dorsalis* following exhaustive exercise. *Journal of Experimental Biology*, **144**, 377-393.

- Gleeson, T.T. & Hancock, T.V. (2002) Metabolic implications of a 'run now, pay later' strategy in lizards: an analysis of post-exercise oxygen consumption. *Comparative Biochemistry and Physiology Part A: Molecular & Integrative Physiology*, **133**, 259-267.
- González-Morales, J.C., Beamonte-Barrientos, R., Bastiaans, E., Guevara-Fiore, P., Quintana, E. & Fajardo, V. (2017) A mountain or a plateau? Hematological traits vary nonlinearly with altitude in a highland lizard. *Physiological and Biochemical Zoology*, **90**, 638-645.
- Gunderson, A.R. & Stillman, J.H. (2015) Plasticity in thermal tolerance has limited potential to buffer ectotherms from global warming. *Proceedings of the Royal Society B-Biological Sciences*, **282**, 20150401.
- Gvoždík, L. & Castilla, A.M. (2001) A comparative study of preferred body temperatures and critical thermal tolerance limits among populations of *Zootoca vivipara* (Squamata: Lacertidae) along an altitudinal gradient. *Journal of Herpetology*, **35**, 486-492.
- Hailey, A., Gaitanaki, C. & Lombourdis, N. (1987) Metabolic recovery from exhaustive activity by a small lizard. *Comparative Biochemistry and Physiology Part A*, **88**, 683-689.
- Hamilton, W.J. (1973) *Life's color code*. McGraw Hill, New York, NY.
- Hertz, P., Arce-Hernandez, A., Ramirez-Vazquez, J., Tirado-Rivera, W. & Vazquez-Vives, L. (1979) Geographical variation of heat sensitivity and water loss rates in the tropical lizard, *Anolis gundlachi*. *Comparative Biochemistry and Physiology Part A: Physiology*, **62**, 947-953.
- Hertz, P.E. & Huey, R.B. (1981) Compensation for altitudinal changes in the thermal environment by some *Anolis* lizards on Hispaniola. *Ecology*, **62**, 515-521.
- Hertz, P.E., Huey, R.B. & Stevenson, R. (1993) Evaluating temperature regulation by field-active ectotherms: the fallacy of the inappropriate question. *The American Naturalist*, **142**, 796-818.
- Hicks, J. W. and Wood, S. C. (1985). Temperature regulation in lizards: effects of hypoxia. *American Journal of Physiology-Regulatory, Integrative and Comparative Physiology* **248**, R595-R600.
- Hillman, S.S., Hancock, T.V. & Hedrick, M.S. (2013) A comparative meta-analysis of maximal aerobic metabolism of vertebrates: implications for respiratory and cardiovascular limits to gas exchange. *Journal of Comparative Physiology B*, **183**, 167-179.
- Hodgson, M.J. & Schwanz, L.E. (2019) Drop it like it's hot: Interpopulation variation in thermal phenotypes shows counter-gradient pattern. *Journal of Thermal Biology*, **83**, 178-186.
- Hoffmann, A.A. & Sgro, C.M. (2011) Climate change and evolutionary adaptation. *Nature*, **470**, 479-485.
- Huey, R.B. (1982) Temperature, physiology, and the ecology of reptiles. *Biology of the Reptilia*. Academic Press.
- Huey, R.B. & Bennett, A.F. (1987) Phylogenetic studies of coadaptation: preferred temperatures versus optimal performance temperatures of lizards. *Evolution*, **41**, 1098-1115.
- Huey, R.B., Deutsch, C.A., Tewksbury, J.J., Vitt, L.J., Hertz, P.E., Álvarez Pérez, H.J. & Garland Jr, T. (2009) Why tropical forest lizards are vulnerable to climate warming. *Proceedings of the Royal Society B: Biological Sciences*, 276, 1939-1948.
- Huey, R.B., Kearney, M.R., Krockenberger, A., Holtum, J.A., Jess, M. & Williams, S.E. (2012) Predicting organismal vulnerability to climate warming: roles of behaviour, physiology and adaptation. *Philosophical Transactions of the Royal Society B: Biological Sciences*, **367**, 1665-1679.
- Huey, R.B. & Stevenson, R.D. (1979) Integrating thermal physiology and ecology of ectotherms: A discussion of approaches. *American Zoologist*, **19**, 357-366.
- Jacobsen, D. (2020) The dilemma of altitudinal shifts: caught between high temperature and low oxygen. *Frontiers in Ecology and the Environment*, **18**, 211-218.
- Kellermann, V., Overgaard, J., Hoffmann, A.A., Fløjgaard, C., Svenning, J.-C. & Loeschcke, V. (2012) Upper thermal limits of *Drosophila* are linked to species distributions and strongly constrained phylogenetically. *Proceedings of the National Academy of Sciences*, **109**, 16228-16233.

- Kelly, M. (2019) Adaptation to climate change through genetic accommodation and assimilation of plastic phenotypes. *Philosophical Transactions of the Royal Society B*, **374**, 20180176.
- Kenward, M.G. & Roger, J.H. (1997) Small sample inference for fixed effects from restricted maximum likelihood. *Biometrics*, 983-997.
- Kouyoumdjian, L., Gangloff, E.J., Souchet, J., Cordero, G.A., Dupoue, A. & Aubret, F. (2019) Transplanting gravid lizards to high elevation alters maternal and embryonic oxygen physiology, but not reproductive success or hatchling phenotype. *Journal of Experimental Biology*, **222**, jeb206839.
- Kraskura, K. & Nelson, J.A. (2018) Hypoxia and sprint swimming performance of juvenile striped bass, *Morone saxatilis*. *Physiological and Biochemical Zoology*, **91**, 682-690.
- Lenth, R., Singmann, H., Love, J., Buerkner, P. & Herve, M. (2018) Emmeans: Estimated marginal means, aka least-squares means. *R package version*, **1**, 3.
- Li, W., Liang, S., Wang, H., Xin, Y., Lu, S., Tang, X. & Chen, Q. (2016) The effects of chronic hypoxia on thermoregulation and metabolism in *Phrynocephalus vlanguaii*. *Asian Herpetological Research*, **7**, 103-111.
- Li, X., Wu, P., Ma, L., Huebner, C., Sun, B. & Li, S. (2020) Embryonic and post-embryonic responses to high-elevation hypoxia in a low-elevation lizard. *Integrative Zoology*, **15**, 338-348.
- Lighton, J.R. (2008) Flow-through respirometry: the equations. *Measuring Metabolic Rates*, pp. 94-100. Oxford University Press.
- Llewellyn, J., Macdonald, S., Hatcher, A., Moritz, C. & Phillips, B.L. (2017) Thermoregulatory behaviour explains countergradient variation in the upper thermal limit of a rainforest skink. *Oikos*, **126**, 748-757.
- Llewellyn, J., Macdonald, S.L., Hatcher, A., Moritz, C., Phillips, B.L. & Franklin, J. (2016) Intraspecific variation in climate-relevant traits in a tropical rainforest lizard. *Diversity and Distributions*, **22**, 1000-1012.
- Lu, S., Xin, Y., Tang, X., Yue, F., Wang, H., Bai, Y., Niu, Y. & Chen, Q. (2015) Differences in hematological traits between high- and low-altitude lizards (Genus *Phrynocephalus*). *Plos One*, **10**, e0125751.
- MacLean, G.S., Lee, A.K. & Wilson, K.J. (1973) A simple method of obtaining blood from lizards. *Copeia*, **1973**, 338-339.
- Michaelides, S.N., While, G.M., Zajac, N. & Uller, T. (2015) Widespread primary, but geographically restricted secondary, human introductions of wall lizards, *Podarcis muralis*. *Molecular Ecology*, **24**, 2702-2714.
- Michniewicz, R. & Aubret, F. (2010) Warming up for cold water: influence of habitat type on thermoregulatory tactics in a semi-aquatic snake. *Amphibia-Reptilia*, **31**, 525-531.
- Munday, P.L., Donelson, J.M. & Domingos, J.A. (2017) Potential for adaptation to climate change in a coral reef fish. *Global Change Biology*, **23**, 307-317.
- Muñoz, M.M. & Bodensteiner, B.L. (2019) Janzen's hypothesis meets the Bogert effect: Connecting climate variation, thermoregulatory behavior, and rates of physiological evolution. *Integrative Organismal Biology*, **1**, oby002.
- Muñoz, M.M. & Losos, J.B. (2018) Thermoregulatory behavior simultaneously promotes and forestalls evolution in a tropical lizard. *The American Naturalist*, **191**, E15-E26.
- Muñoz, M.M., Stimola, M.A., Algar, A.C., Conover, A., Rodriguez, A.J., Landestoy, M.A., Bakken, G.S. & Losos, J.B. (2014) Evolutionary stasis and lability in thermal physiology in a group of tropical lizards. *Proceedings of the Royal Society B*, **281**, 20132433.
- Ortega, Z. & Martín-Vallejo, F.J. (2019) Main factors affecting lacertid lizard thermal ecology. *Integrative zoology*, **14**, 293-305.

- Ortega, Z., Mencia, A. & Perez-Mellado, V. (2016) The peak of thermoregulation effectiveness: Thermal biology of the Pyrenean rock lizard, *Iberolacerta bonnali* (Squamata, Lacertidae). *Journal of Thermal Biology*, **56**, 77-83.
- Pafilis, P., Foufopoulos, J., Poulakakis, N., Lymberakis, P. & Valakos, E. (2007) Digestive performance in five Mediterranean lizard species: effects of temperature and insularity. *Journal of Comparative Physiology B*, **177**, 49-60.
- Pauchard, A., Milbau, A., Albiñ, A., Alexander, J., Burgess, T., Daehler, C., Englund, G., Essl, F., Evengård, B. & Greenwood, G.B. (2016) Non-native and native organisms moving into high elevation and high latitude ecosystems in an era of climate change: new challenges for ecology and conservation. *Biological Invasions*, **18**, 345-353.
- Pettersen, A.K. (2020) Countergradient variation in reptiles: thermal sensitivity of developmental and metabolic rates across locally adapted populations. *Frontiers in physiology*, **11**, 547.
- Phillips, B. L., Muñoz, M. M., Hatcher, A., Macdonald, S. L., Llewelyn, J., Lucy, V., Moritz, C. and Grémillet, D. (2016). Heat hardening in a tropical lizard: geographic variation explained by the predictability and variance in environmental temperatures. *Functional Ecology* **30**, 1161-1168.
- Plasman, M., Bautista, A., Mc, C.M. & Diaz, D.E.L.A.V.-P.A.H. (2020) Resting metabolic rates increase with elevation in a mountain-dwelling lizard. *Integrative Zoology*, **15**, 363-374.
- Pörtner, H.-O. (2002) Climate variations and the physiological basis of temperature dependent biogeography: systemic to molecular hierarchy of thermal tolerance in animals. *Comparative Biochemistry and Physiology Part A: Molecular & Integrative Physiology*, **132**, 739-761.
- Pörtner, H.-O., Bock, C. & Mark, F.C. (2017) Oxygen-and capacity-limited thermal tolerance: bridging ecology and physiology. *Journal of Experimental Biology*, **220**, 2685-2696.
- Pottier, G. (2017) Plan National d'Actions en faveur des Lézards des Pyrénées 2013-2017. *Plans Nationaux d'Actions pour les espèces menacées de France*. pp. 125. Nature Midi-Pyrénées, Bagnères de Bigorre.
- R Core Team (2018) R: A language and environment for statistical computing. R Foundation for Statistical Computing, Vienna.
- Schlittler, M., *et al.* (2020) Regulation of plasma volume in male lowlanders during 4 days of exposure to hypobaric hypoxia equivalent to 3500 m altitude. *The Journal of Physiology*.
- Schulte, P.M., Healy, T.M. & Fanguie, N.A. (2011) Thermal performance curves, phenotypic plasticity, and the time scales of temperature exposure. *Integr Comp Biol*, **51**, 691-702.
- Seibel, B.A. & Deutsch, C. (2020) Oxygen supply capacity in animals evolves to meet maximum demand at the current oxygen partial pressure regardless of size or temperature. *Journal of Experimental Biology*, **223**, jeb210492.
- Souchet, J., *et al.* (2020a) High temperatures limit developmental resilience to high-elevation hypoxia in the snake *Natrix maura* (Squamata: Colubridae). *Biological Journal of the Linnean Society*, **132**, 116-133.
- Souchet, J., Gangloff, E.J., Micheli, G., Bossu, C., Trochet, A., Bertrand, R., Clobert, J., Calvez, O., Martinez-Silvestre, A., Darnet, E., H, L.E.C., Guillaume, O., Mossoll-Torres, M., Barthe, L., Pottier, G., Philippe, H. & Aubret, F. (2020b) High-elevation hypoxia impacts perinatal physiology and performance in a potential montane colonizer. *Integrative Zoology*, **15**, 544-557.
- Storz, J.F. (2021) High-altitude adaptation: Mechanistic insights from integrated genomics and physiology. *Molecular Biology and Evolution*.
- Storz, J.F., Scott, G.R. & Cheviron, Z.A. (2010) Phenotypic plasticity and genetic adaptation to high-altitude hypoxia in vertebrates. *Journal of Experimental Biology*, **213**, 4125-4136.
- Swaegers, J., Spanier, K.I. & Stoks, R. (2020) Genetic compensation rather than genetic assimilation drives the evolution of plasticity in response to mild warming across latitudes in a damselfly. *Molecular Ecology*, **29**, 4823-4834.



- Taylor, E.N., Diele- Viegas, L.M., Gangloff, E.J., Hall, J.M., Halpern, B., Massey, M.D., Rödder, D., Rollinson, N., Spears, S., Sun, B.j. & Telemeco, R.S. (2021) The thermal ecology and physiology of reptiles and amphibians: A user's guide. *Journal of Experimental Zoology Part A*.
- Telemeco, R.S. & Gangloff, E.J. (2020) Analyzing stress as a multivariate phenotype. *Integrative and Comparative Biology*, **60**, 70-78.
- Telemeco, R.S. & Gangloff, E.J. (2021) Introduction to the Special Issue—Beyond CTmax & CTmin: Advances in Studying the Thermal Limits of Reptiles & Amphibians. *Journal of Experimental Zoology A*, **335**, 5-12.
- Trochet, A., Dupoué, A., Souchet, J., Bertrand, R., Deluen, M., Murarasu, S., Calvez, O., Martinez-Silvestre, A., Verdaguer-Foz, I., Darnet, E. et al. (2018). Variation of preferred body temperatures along an altitudinal gradient: A multi-species study. *Journal of Thermal Biology* **77**, 38-44.
- Van Damme, R., Bauwens, D., Castilla, A.M. & Verheyen, R.F. (1989) Altitudinal variation of the thermal biology and running performance in the lizard *Podarcis tiliguerta*. *Oecologia*, **80**, 516-524.
- Van Damme, R., Bauwens, D. & Verheyen, R. (1991) The thermal dependence of feeding behaviour, food consumption and gut-passage time in the lizard *Lacerta vivipara* Jacquin. *Functional Ecology*, 507-517.
- West-Eberhard, M.J. (2003) *Developmental Plasticity and Evolution*. Oxford University Press.
- Wickham, H. (2011) ggplot2. *Wiley Interdisciplinary Reviews: Computational Statistics*, **3**, 180-185.
- Yang, W., Feiner, N., Pinho, C., While, G.M., Kaliontzopoulou, A., Harris, D.J., Salvi, D. & Uller, T. (2021) Extensive introgression and mosaic genomes of Mediterranean endemic lizards. *Nature Communications*, **12**, 2762.

## Figures

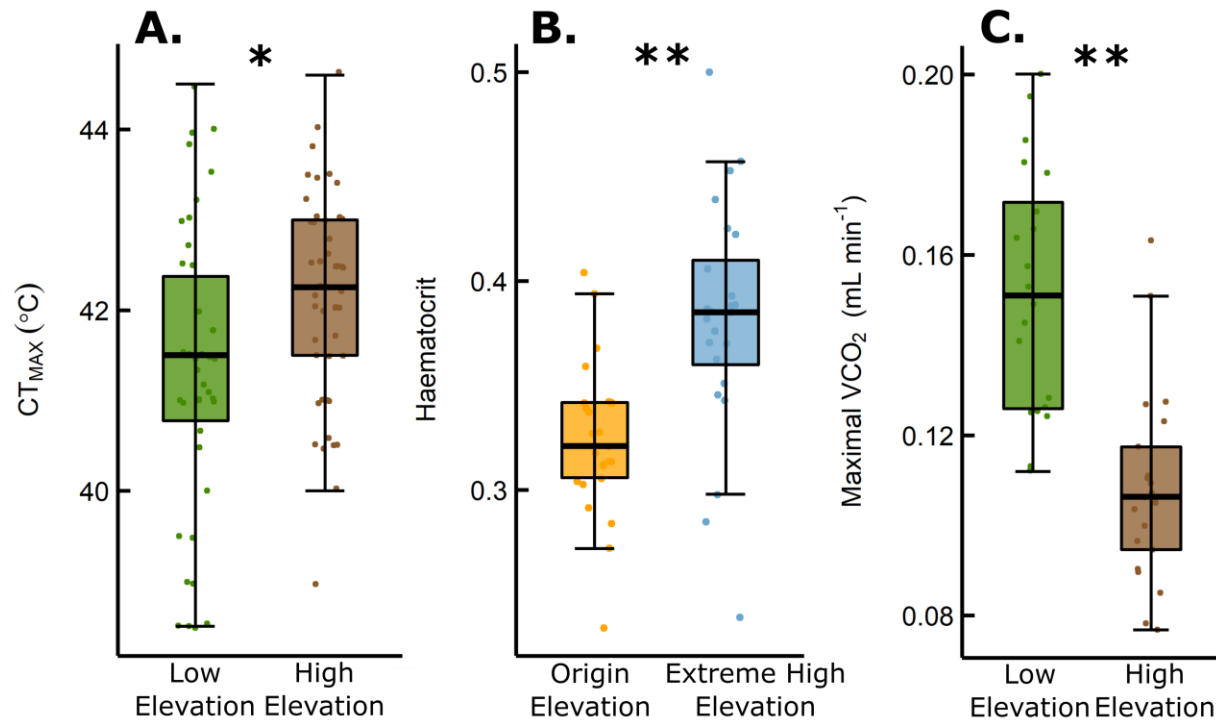

**Fig. 1. Selected thermal-metabolic traits in adult male *Podarcis muralis* lizards.** Tukey boxplots show median, interquartile range, and range of raw data values. (A) Critical thermal maximum ( $CT_{MAX}$ ) in lizards originating from populations at low- and high-elevations, including all measurements. (B) Haematocrit in lizards after acclimation period, measured at elevation of origin and extreme high elevation. (C) Maximal post-exhaustion metabolic rate ( $\dot{V}CO_{2peak}$ ) in lizards from populations at low- and high-elevations, including all measurements. (\* :  $P < 0.05$ , \*\* :  $P < 0.01$ ).

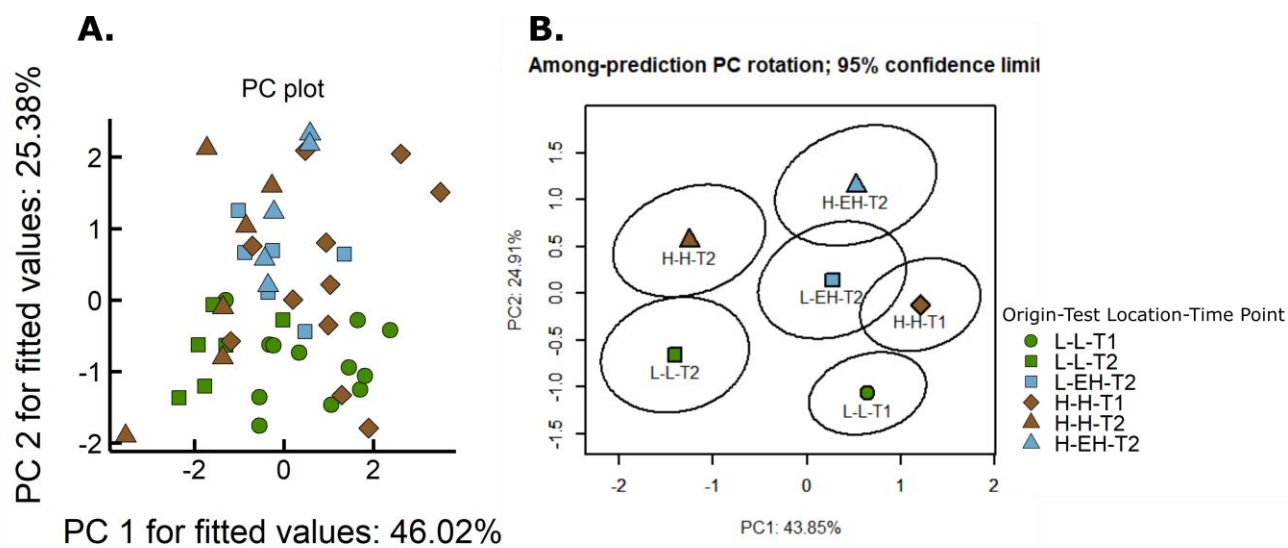

**Fig. 2. Principal component (PC) plots of multivariate thermal-metabolic phenotype of common wall lizards (*Podarcis muralis*) from low- and high-elevation populations.** Traits were measured at population of origin and after transplant to extreme high elevation (see text for experimental design details). (A) Fitted values from an NP-MANOVA with RRPP model for each individual projected onto PC space. (B) Least-squares means and 95% confidence ellipses from an NPMANOVA with RRPP model. Loadings from this PCA are provided in **Table 2**. Treatment groups identified by combination of population origin (L: Low, H: High), test location (L: Low, H: High, EH: Extreme High) and timepoint (T1: Timepoint 1, T2: Timepoint 2).



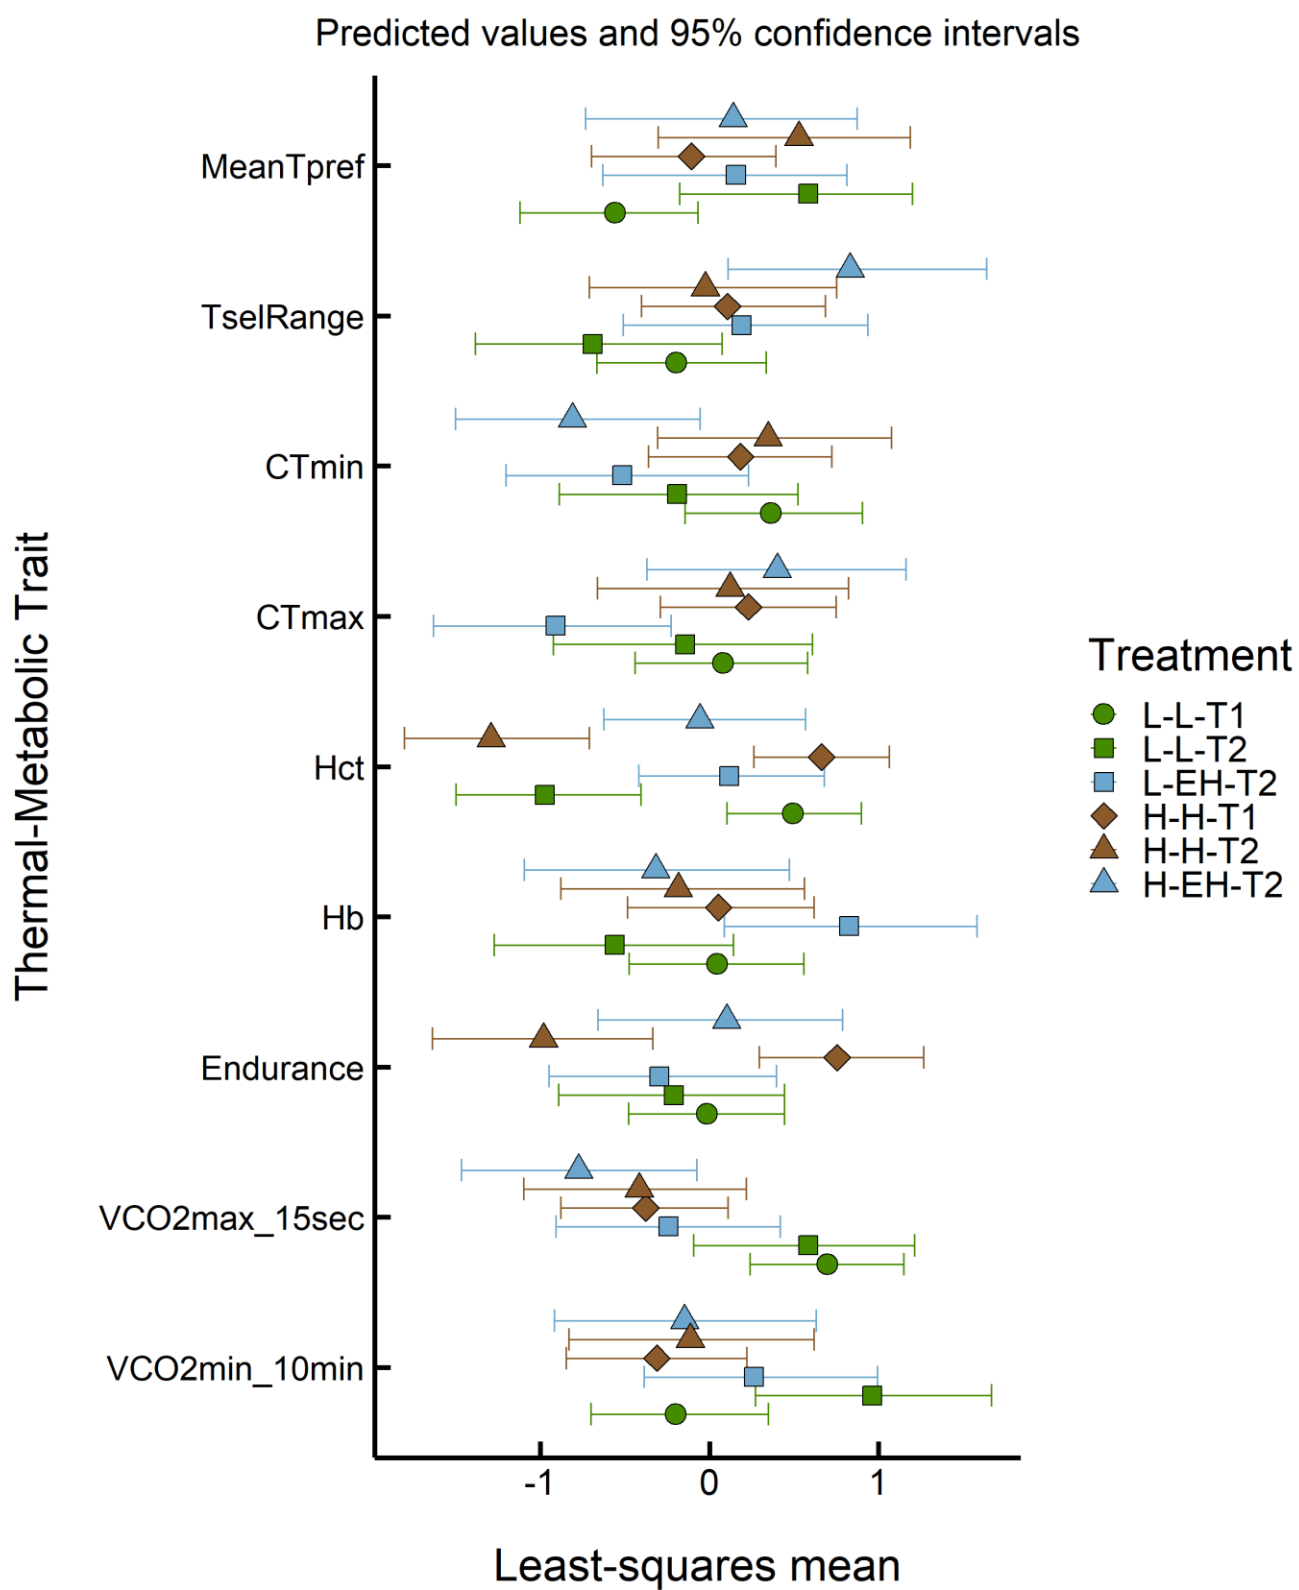

**Fig. 3. Least-squares means and 95% confidence intervals for thermal-metabolic traits of common wall lizards (*Podarcis muralis*).** Values are generated from an NP-MANOVA with RRPP model traits in lizards from low- and high-elevation populations at population of origin and after transplant to extreme high elevation. Values shown are predicted values from the model after accounting for covariation within the response matrix, displayed on a z-standardized scale. Treatment groups identified by combination of population origin (L: Low, H: High), test location (L: Low, H: High, EH: Extreme High) and timepoint (T1: Timepoint 1, T2: Timepoint 2).

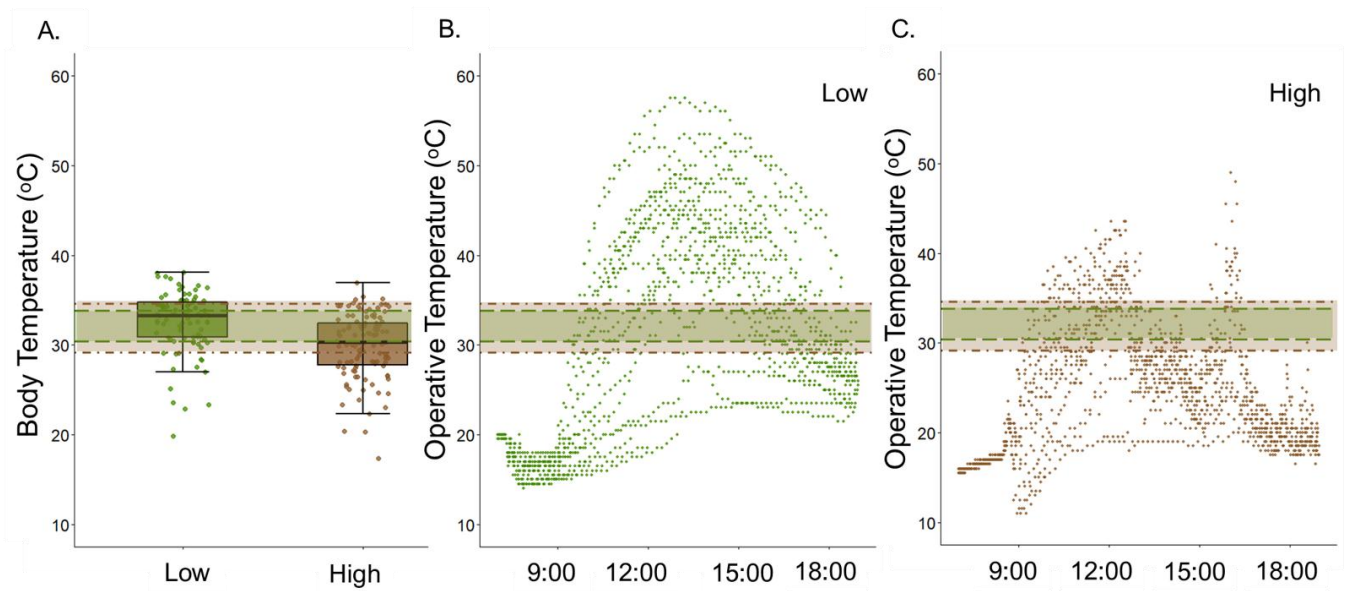

**Fig. 4. Thermal preference and thermoregulatory efficiency in common wall lizards (*Podarcis muralis*) from low- and high-elevation populations.** (A) Box and whisker plot of field measured body temperatures for low elevation lizards (green) and high elevation lizards (brown). (B) Raw temperature data from operative models located at low- and (C) high-elevation populations. Transparent horizontal bars across all panels show the selected range temperatures ( $T_{SEL}$ ) for each population low- (green) and high- elevation (brown) populations.

**Table 1.** Predictions for thermal-metabolic traits in adult male *Podarcis muralis* lizards originating from populations at different elevations and in response to a novel hypoxic environment.

| Trait                                       | Abbreviation                           | Prediction for differences between populations at different elevations                                     | Prediction for response to novel hypoxia                                                                                                                                               | References                                                                                                                             |
|---------------------------------------------|----------------------------------------|------------------------------------------------------------------------------------------------------------|----------------------------------------------------------------------------------------------------------------------------------------------------------------------------------------|----------------------------------------------------------------------------------------------------------------------------------------|
| Thermal preference                          | $T_{\text{PREF}}$                      | Lower $T_{\text{PREF}}$ at high elevation                                                                  | No reduction if decrease in O <sub>2</sub> availability is not limiting RMR, or slight decrease                                                                                        | Hicks and Woods (1985)<br>Li <i>et al.</i> (2016, 2020)<br>Gilbert and Miles (2019)                                                    |
| Selected temperature range                  | $T_{\text{SEL}}$                       | High-elevation lizards will have a narrower range to compensate for reduced thermal quality of environment | Narrowing of range if upper threshold is reduced in response to hypoxia                                                                                                                | Ortega, Mencia and Perez-Mellado (2016)<br>Gangloff and Telemeco (2018)                                                                |
| Critical thermal minimum                    | $CT_{\text{MIN}}$                      | High-elevation will be more cold tolerant (lower $CT_{\text{MIN}}$ ) due to cooler environmental temps     | No change as $CT_{\text{MIN}}$ is unlikely to be O <sub>2</sub> -dependent under mild hypoxia                                                                                          | Bodensteiner <i>et al.</i> (2021)<br>Gilbert and Miles (2019)<br>Muñoz <i>et al.</i> (2014)                                            |
| Critical thermal maximum                    | $CT_{\text{MAX}}$                      | No difference due to behavioral thermoregulation/local adaptation                                          | Reduced $CT_{\text{MAX}}$ if limit is induced by oxygen capacity, which is diminished as O <sub>2</sub> availability decreases, but likely not at this level of reduced O <sub>2</sub> | Bodensteiner <i>et al.</i> (2021)<br>Muñoz and Bodensteiner (2019)<br>Gangloff and Telemeco (2018)<br>Gvoždík and Castilla (2001)      |
| Haematocrit (packed red blood cell density) | Hct                                    | High-elevation lizards will have higher Hct at native elevations                                           | Increase in short-term response to hypoxia, but change will be more dramatic in low-elevation lizards                                                                                  | Kouyoumdjian <i>et al.</i> (2019)<br>Gangloff <i>et al.</i> (2019)<br>González-Morales <i>et al.</i> (2017)<br>Lu <i>et al.</i> (2015) |
| Haemoglobin concentration                   | [Hb]                                   | Same as for Hct                                                                                            | Same as for Hct                                                                                                                                                                        | <i>Ibid.</i>                                                                                                                           |
| Running endurance                           | Endurance                              | No difference due to adaptation to local conditions                                                        | Reduced due to immediate O <sub>2</sub> constraints                                                                                                                                    | Gangloff <i>et al.</i> (2019)<br>Souchet <i>et al.</i> (2020a,b)<br>Kraskura and Nelson (2018)                                         |
| Resting metabolic rate                      | RMR; $\dot{V}\text{CO}_2$              | No differences in resting metabolic rate or slightly higher rates in high-elevation populations            | No response since O <sub>2</sub> is not limiting under resting conditions                                                                                                              | Kouyoumdjian <i>et al.</i> (2019)<br>Plasman <i>et al.</i> (2020)                                                                      |
| Maximum post-exhaustion metabolic rate      | MMR; $\dot{V}\text{CO}_{2\text{peak}}$ | Reduced in high-elevation populations                                                                      | Reduced due to immediate O <sub>2</sub> constraints                                                                                                                                    | Gangloff <i>et al.</i> (2019)<br>Hillman, Hancock and Hedrick (2013)                                                                   |

**Table 2:** Variable loadings from a principal component analysis (PCA) on predicted values for the multivariate thermal-metabolic phenotype of common wall lizards (*Podarcis muralis*). Lizards are from low- and high-elevation populations, measured at population of origin and after transplant to extreme high elevation (see text for experimental design details). Predicted values were generated using an NP-MANOVA with RRPP model implemented using the “RRPP” package in R. Abbreviations:  $T_{\text{PREF}}$ , thermal preference;  $T_{\text{SEL}}$ , selected thermal range;  $CT_{\text{MIN}}$ , critical thermal minimum;  $CT_{\text{MAX}}$ , critical thermal maximum; Hct, haematocrit; [Hb], blood haemoglobin concentration; Endurance, running endurance; RMR, resting metabolic rate ( $\dot{V}\text{CO}_2$ ); MMR, maximal post-exhaustion metabolic rate ( $\dot{V}\text{CO}_{2\text{PEAK}}$ )

| Response variable      | PC1 (46.0%) | PC2 (25.4%) | PC3 (14.5%) | PC4 (9.7%) | PC5 (4.4%) |
|------------------------|-------------|-------------|-------------|------------|------------|
| $T_{\text{PREF}}$      | -0.321      | 0.219       | -0.072      | 0.159      | -0.423     |
| $T_{\text{SEL}}$ Range | 0.257       | 0.496       | -0.018      | -0.020     | 0.375      |
| $CT_{\text{MIN}}$      | -0.050      | -0.341      | 0.361       | -0.560     | -0.400     |
| $CT_{\text{MAX}}$      | 0.058       | 0.119       | 0.671       | 0.097      | 0.117      |
| Hct                    | 0.716       | -0.231      | -0.100      | 0.065      | 0.041      |
| [Hb]                   | 0.205       | -0.012      | -0.548      | -0.398     | -0.194     |
| Endurance              | 0.411       | -0.132      | 0.146       | 0.504      | -0.504     |
| RMR                    | -0.289      | -0.177      | -0.287      | 0.474      | -0.063     |
| MMR                    | -0.131      | -0.688      | -0.010      | 0.096      | 0.457      |

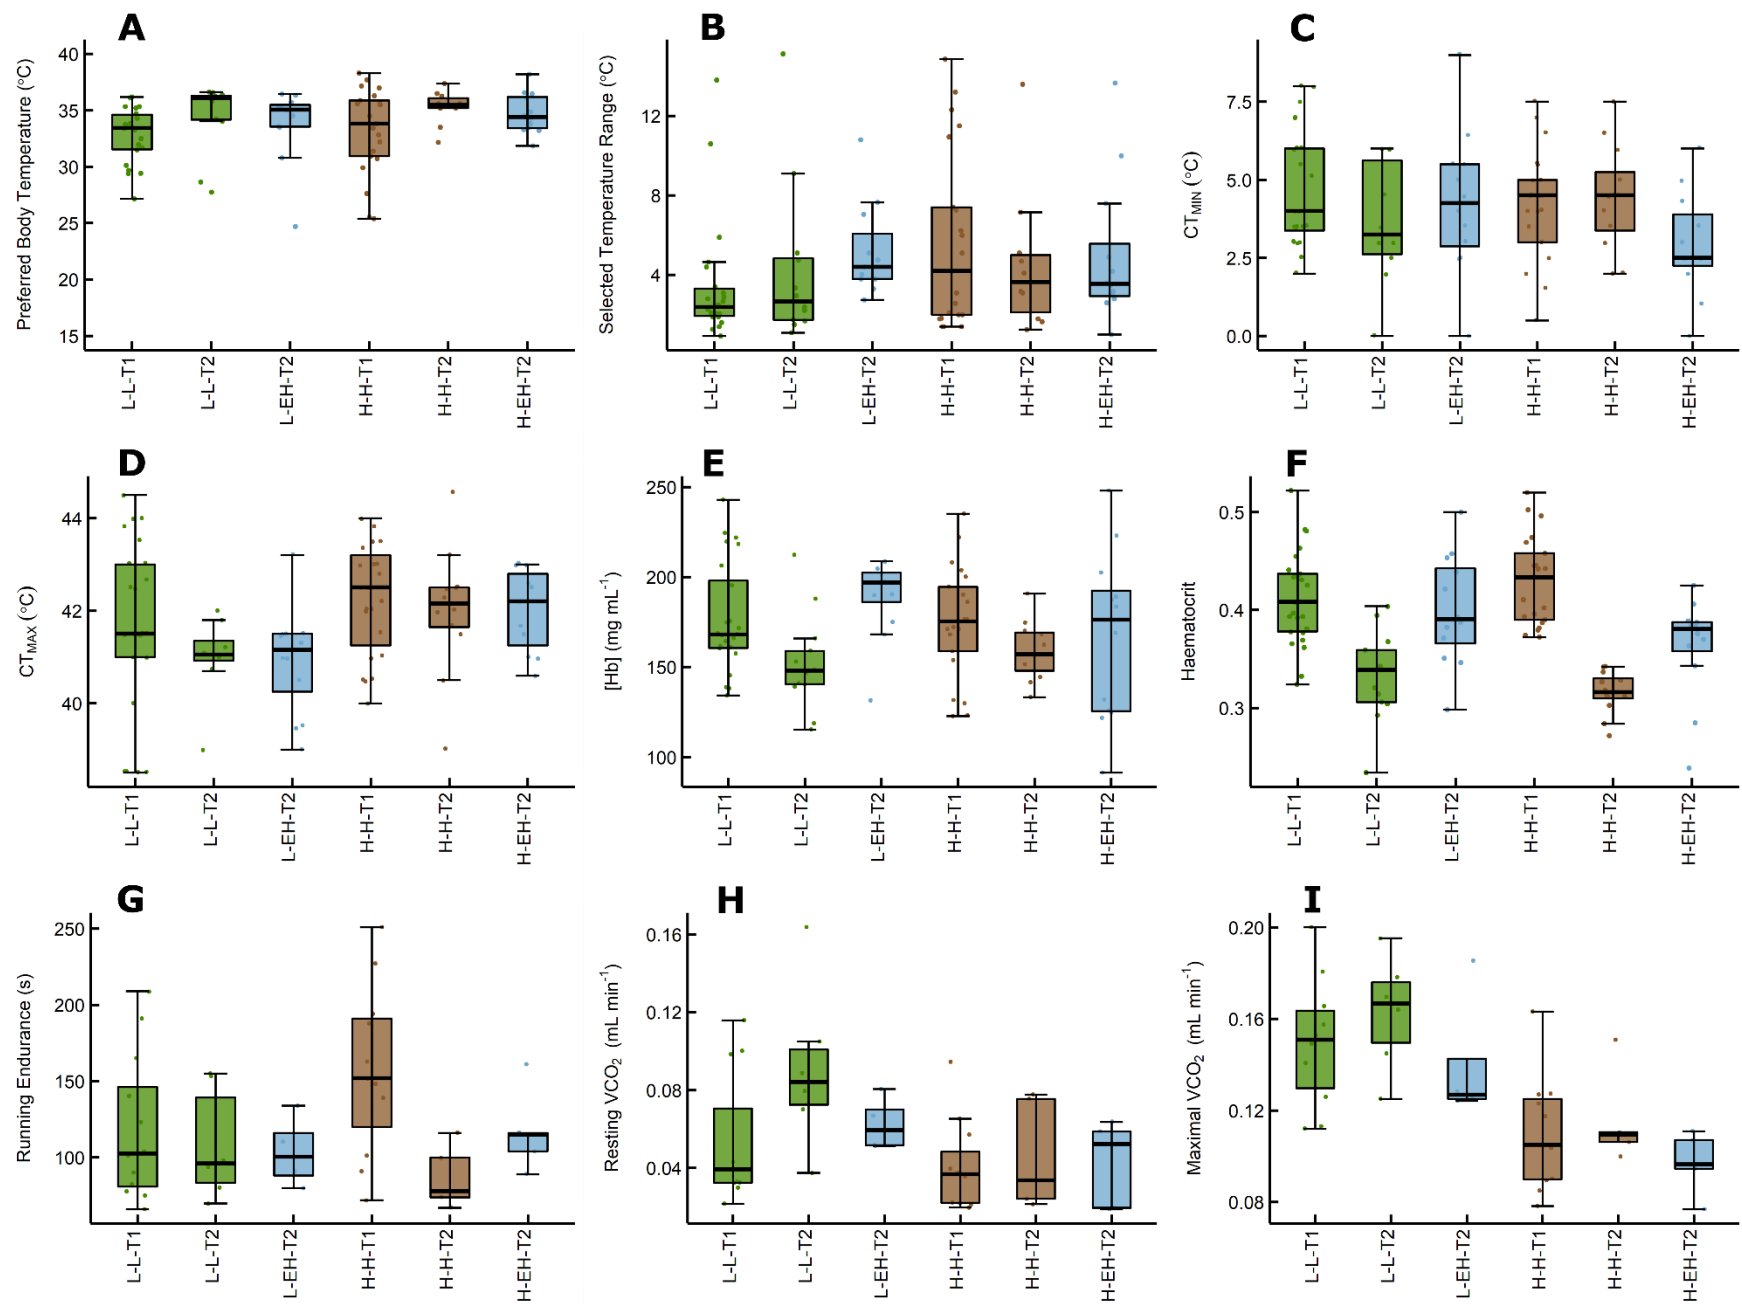

**Fig. S1. Thermal-metabolic traits in in adult male *Podarcis muralis* lizards.** Tukey boxplots show median, interquartile range, and range of raw data values. (A) Preferred body temperature, (B) Selected temperature range, (C) Critical thermal minimum (CT<sub>MIN</sub>), (D) Critical thermal maximum (CT<sub>MAX</sub>), (E) Haematocrit, (F) Blood haemoglobin concentration, (G) Running endurance, (H) Resting metabolic rate (RMR,  $\dot{V}CO_2$ ), (I) Maximal post-exhaustion metabolic rate (MMR,  $\dot{V}CO_{2PEAK}$ ). L-L-T1: Low-elevation lizards measured at low elevation at first timepoint; L-L-T2: Low-elevation lizards measured at low elevation at second timepoint; L-EH-T2: Low-elevation lizards measured at extreme high elevation at second timepoint; H-H-T1: High-elevation lizards measured at high elevation at first timepoint; H-H-T2: High-elevation lizards measured at high elevation at second timepoint; H-EH-T2: High-elevation lizards measured at extreme high elevation at second timepoint

**Table S1.** Geographic location and description of lizard collection sites and locations of experimental measures.

|                     | Name                 | Field T <sub>b</sub><br>Sample Size | Experiment<br>Sample size<br>(Metabolic<br>Measures) | Latitude    | Longitude    | Elevation<br>(m ASL) | Elevation<br>category | Habitat type                      | Partial<br>pressure of<br>O <sub>2</sub> (kPa;<br>average) |
|---------------------|----------------------|-------------------------------------|------------------------------------------------------|-------------|--------------|----------------------|-----------------------|-----------------------------------|------------------------------------------------------------|
| <b>Field sites</b>  |                      |                                     |                                                      |             |              |                      |                       |                                   |                                                            |
|                     | Aubert               | 90                                  | 15 (12)                                              | 42°57'52" N | 001°6'10" E  | 425                  | Low                   | Rock wall and<br>bridge           | 20.2                                                       |
|                     | Engomer              | --                                  | 10 (0)                                               | 42°56'46" N | 001°3'20" E  | 473                  | Low                   | Cemetery                          | 20.1                                                       |
|                     | La Mongie            | 111                                 | 16 (11)                                              | 42°54'35" N | 0°10'12" E   | 1812                 | High                  | Natural outcrops<br>and rock wall | 17.1                                                       |
|                     | L'Adour du Tourmalet | --                                  | 8 (0)                                                | 42°55'14" N | 0°11'18" E   | 1557                 | High                  | Natural rock<br>outcrops          | 17.6                                                       |
| <b>Laboratories</b> |                      |                                     |                                                      |             |              |                      |                       |                                   |                                                            |
|                     | Moulis               |                                     |                                                      | 42°57'27" N | 001°5'8" E   | 436                  | Low                   | Lab                               | 20.1                                                       |
|                     | La Mongie            |                                     |                                                      | 42°54'35" N | 001°10'54" E | 1735                 | High                  | Lab                               | 17.4                                                       |
|                     | Pic du Midi          |                                     |                                                      | 42°56'11" N | 008°5'33" E  | 2877                 | Extreme High          | Lab                               | 15.3                                                       |



**Table S2. Results of linear mixed model analyses and results of *a priori* hypothesis tests of thermal-metabolic traits in adult male *Podarcis muralis* lizards.** Tests were constructed using linear contrasts of estimated marginal means. Estimate represents the differences in observed values between groups, taking into account covariates included in the model (see text for statistical details). Significant contrasts shown in bold with one ( $P < 0.05$ ), two ( $P < 0.01$ ), or three ( $P < 0.001$ ) asterisks. Abbreviations: T<sub>PREF</sub>, thermal preference; T<sub>SEL</sub>, selected thermal range; CT<sub>MIN</sub>, critical thermal minimum; CT<sub>MAX</sub>, critical thermal maximum; Hct, haematocrit; [Hb], blood haemoglobin concentration; Endurance, running endurance; RMR, resting metabolic rate ( $V\text{ CO}_2$ ); MMR, maximal post-exhaustion metabolic rate ( $V\text{ CO}_{2\text{PEAK}}$ ); dfn: numerator degrees of freedom for F-test; dfd: denominator degrees of freedom for F-test; Pr > F is the probability that the observed value is greater than that predicted by the F-distribution (P-value)

|                                                                                                         |                                               | T <sub>PREF</sub><br>N = 88<br>obs. | T <sub>SEL</sub><br>(log <sub>10</sub> )<br>N = 88<br>obs. | CT <sub>MIN</sub><br>N = 90<br>obs. | CT <sub>MAX</sub><br>N = 88<br>obs. | Hct<br>N = 95<br>obs. | [Hb]<br>N = 93<br>obs. | Endurance<br>(log <sub>10</sub> )<br>N = 43<br>obs. | RMR<br>(log <sub>10</sub> )<br>N = 42<br>obs. | MMR<br>(log <sub>10</sub> )<br>N = 41<br>obs. |
|---------------------------------------------------------------------------------------------------------|-----------------------------------------------|-------------------------------------|------------------------------------------------------------|-------------------------------------|-------------------------------------|-----------------------|------------------------|-----------------------------------------------------|-----------------------------------------------|-----------------------------------------------|
| <b>Full Model Result</b>                                                                                |                                               |                                     |                                                            |                                     |                                     |                       |                        |                                                     |                                               |                                               |
| <b>Measurement Group</b>                                                                                |                                               |                                     |                                                            |                                     |                                     |                       |                        |                                                     |                                               |                                               |
|                                                                                                         | <i>F</i> (df <sub>n</sub> , df <sub>d</sub> ) | 1.77<br>(5, 66.5)                   | 1.40<br>(5, 66.7)                                          | 2.11<br>(5, 63.7)                   | 2.11<br>(5, 67.8)                   | 15.70<br>(5, 72.2)    | 2.24<br>(5, 71.0)      | <b>4.53</b><br><b>(5, 25.7)</b>                     | 0.850<br>(5, 28.3)                            | <b>4.36</b><br><b>(5, 27.4)</b>               |
|                                                                                                         | Pr > F                                        | 0.132                               | 0.236                                                      | 0.076                               | 0.075                               | <b>0.0001**</b><br>*  | 0.0593                 | <b>0.0043**</b><br>*                                | 0.526                                         | <b>0.0048**</b>                               |
| <b>Body Size</b>                                                                                        |                                               |                                     |                                                            |                                     |                                     |                       | SVL                    | SVL                                                 | log <sub>10</sub><br>Mass                     | log <sub>10</sub><br>Mass                     |
|                                                                                                         | <i>F</i> (df <sub>n</sub> , df <sub>d</sub> ) | --                                  | --                                                         | --                                  | --                                  | --                    | 3.61<br>(1, 47.0)      | 4.00<br>(1, 18.7)                                   | <b>10.99</b><br><b>(1, 19.5)</b>              | <b>16.9</b><br><b>(1, 23.0)</b>               |
|                                                                                                         | Pr > F                                        |                                     |                                                            |                                     |                                     |                       | 0.063                  | 0.060                                               | <b>0.0036**</b>                               | <b>0.0004**</b><br>*                          |
| <b>Hypothesis Test</b>                                                                                  |                                               |                                     |                                                            |                                     |                                     |                       |                        |                                                     |                                               |                                               |
| <b>Low-elevation lizards vs. High-elevation lizards at elevation of origin</b>                          |                                               |                                     |                                                            |                                     |                                     |                       |                        |                                                     |                                               |                                               |
|                                                                                                         | Estimate (SE)                                 | -1.19<br>(1.596)                    | -0.25<br>(0.1675)                                          | -0.31<br>(1.063)                    | -1.62<br>(0.764)                    | 0<br>(0.0238)         | -12.43<br>(15.85)      | -0.09<br>(0.1262)                                   | 0.23<br>(0.1634)                              | <b>0.21</b><br><b>(0.0543)</b>                |
|                                                                                                         | <i>t</i> -statistic (df)                      | -0.75<br>(58.9)                     | -1.5<br>(58.8)                                             | -0.29<br>(61.6)                     | -2.12<br>(61.9)                     | -0.05<br>(62.4)       | -0.78<br>(57.9)        | -0.72<br>(21.9)                                     | 1.41<br>(20.3)                                | <b>3.95</b><br><b>(19.9)</b>                  |
|                                                                                                         | Pr > t                                        | 0.986                               | 0.652                                                      | > 0.999                             | 0.24                                | > 0.999               | 0.982                  | 0.99                                                | 0.74                                          | <b>0.006**</b>                                |
| <b>Low-elevation lizards vs. High-elevation lizards at extreme high elevation</b>                       |                                               |                                     |                                                            |                                     |                                     |                       |                        |                                                     |                                               |                                               |
|                                                                                                         | Estimate (SE)                                 | -0.93<br>(1.223)                    | 0.09<br>(0.1289)                                           | 1.41<br>(0.755)                     | -1.09<br>(0.586)                    | 0.04<br>(0.0191)      | 16.59<br>(12.82)       | -0.15<br>(0.0993)                                   | 0.03<br>(0.1524)                              | 0.08<br>(0.0501)                              |
|                                                                                                         | <i>t</i> -statistic (df)                      | -0.76<br>(82)                       | 0.67<br>(82)                                               | 1.86<br>(84)                        | -1.86<br>(82)                       | 1.97<br>(89)          | 1.29<br>(86)           | -1.54<br>(36)                                       | 0.22<br>(34.8)                                | 1.52<br>(34)                                  |
|                                                                                                         | Pr > t                                        | 0.984                               | 0.993                                                      | 0.379                               | 0.38                                | 0.311                 | 0.789                  | 0.633                                               | > 0.999                                       | 0.644                                         |
| <b>Low-elevation lizards at elevation of origin vs. Low-elevation lizards at extreme high elevation</b> |                                               |                                     |                                                            |                                     |                                     |                       |                        |                                                     |                                               |                                               |
|                                                                                                         | Estimate (SE)                                 | -0.15<br>(1.023)                    | -0.22<br>(0.108)                                           | 0.07<br>(0.586)                     | 0.41<br>(0.502)                     | -0.03<br>(0.0157)     | -23.21<br>(10.34)      | 0.07<br>(0.0736)                                    | 0.03<br>(0.1199)                              | 0.06<br>(0.0393)                              |
|                                                                                                         | <i>t</i> -statistic (df)                      | -0.15<br>(76.4)                     | -2.08<br>(76.8)                                            | 0.12<br>(65.3)                      | 0.82<br>(79.3)                      | -1.72<br>(83.7)       | -2.25<br>(84)          | 0.99<br>(27.7)                                      | 0.23<br>(34.9)                                | 1.61<br>(33.4)                                |
|                                                                                                         | Pr > t                                        | > 0.999                             | 0.253                                                      | > 0.999                             | 0.976                               | 0.483                 | 0.177                  | 0.941                                               | > 0.999                                       | 0.583                                         |

|                                                                                                                |  |                  |                   |                  |                  |                    |                  |                   |                   |                   |
|----------------------------------------------------------------------------------------------------------------|--|------------------|-------------------|------------------|------------------|--------------------|------------------|-------------------|-------------------|-------------------|
| High-elevation lizards at elevation of origin vs. High-elevation lizards at extreme high elevation             |  |                  |                   |                  |                  |                    |                  |                   |                   |                   |
| Estimate (SE)                                                                                                  |  | -0.49<br>(1.012) | -0.01<br>(0.1067) | 1.63<br>(0.6)    | 0.13<br>(0.496)  | 0.01<br>(0.0159)   | -0.4<br>(10.52)  | -0.03<br>(0.0689) | -0.05<br>(0.114)  | 0.03<br>(0.0372)  |
| t-statistic (df)                                                                                               |  | -0.48<br>(77.4)  | -0.12<br>(77.7)   | 2.72<br>(68.7)   | 0.26<br>(78.7)   | 0.71<br>(83.3)     | -0.04<br>(82.5)  | -0.5<br>(26.7)    | -0.47<br>(33.6)   | 0.87<br>(31.7)    |
| Pr > t                                                                                                         |  | 0.999            | > 0.999           | 0.057            | > 0.999          | 0.99               | > 0.999          | 0.999             | 0.999             | 0.97              |
| All Low-elevation lizards vs. all high-elevation lizards, irrespective of measurement location                 |  |                  |                   |                  |                  |                    |                  |                   |                   |                   |
| Estimate (SE)                                                                                                  |  | -2.13<br>(2.042) | -0.16<br>(0.214)  | 1.1<br>(1.414)   | -2.71<br>(0.954) | 0.04<br>(0.0308)   | 4.16<br>(20.82)  | -0.24<br>(0.1819) | 0.26<br>(0.233)   | 0.29<br>(0.0776)  |
| t-statistic (df)                                                                                               |  | -1.04<br>(49.8)  | -0.77<br>(49.9)   | 0.78<br>(48.9)   | -2.84<br>(52.8)  | 1.19<br>(52.5)     | 0.2<br>(52.5)    | -1.34<br>(20.2)   | 1.13<br>(20.9)    | 3.75<br>(20.4)    |
| Pr > t                                                                                                         |  | 0.92             | 0.984             | 0.983            | 0.044*           | 0.855              | > 0.999          | 0.782             | 0.891             | 0.009**           |
| All lizards at second timepoint measured at elevation of origin vs. lizards measured at extreme high elevation |  |                  |                   |                  |                  |                    |                  |                   |                   |                   |
| Estimate (SE)                                                                                                  |  | -0.64<br>(0.883) | 0.12<br>(0.0931)  | -0.72<br>(0.525) | -0.04<br>(0.439) | 0.06<br>(0.0135)   | 22.2<br>(8.89)   | 0.05<br>(0.0612)  | -0.03<br>(0.0989) | -0.05<br>(0.0324) |
| t-statistic (df)                                                                                               |  | -0.72<br>(80.8)  | 1.29<br>(81)      | -1.37<br>(72.1)  | -0.09<br>(82)    | 4.15<br>(88.4)     | 2.5 (86)         | 0.79<br>(28.8)    | -0.31<br>(35)     | -1.47<br>(33.9)   |
| Pr > t                                                                                                         |  | 0.989            | 0.791             | 0.737            | > 0.999          | 0.001**            | 0.097            | 0.982             | > 0.999           | 0.679             |
| Lizards at first timepoint at elevation of origin vs. lizards at second timepoint at elevation of origin       |  |                  |                   |                  |                  |                    |                  |                   |                   |                   |
| Estimate (SE)                                                                                                  |  | 1.91<br>(0.739)  | 0<br>(0.0781)     | -0.26<br>(0.413) | -0.46<br>(0.382) | -0.1<br>(0.0113)   | -20.78<br>(7.69) | -0.14<br>(0.0435) | 0.09<br>(0.0797)  | 0<br>(0.0264)     |
| t-statistic (df)                                                                                               |  | 2.59<br>(55.9)   | -0.04<br>(56.1)   | -0.62<br>(53.9)  | -1.22<br>(61.9)  | -8.54<br>(61.3)    | -2.7<br>(60.8)   | -3.11<br>(21.3)   | 1.1<br>(24.7)     | 0.01<br>(24.3)    |
| Pr > t                                                                                                         |  | 0.083            | > 0.999           | 0.996            | 0.837            | <<br>0.0001**<br>* | 0.061            | 0.036*            | 0.90              | > 0.999           |

**Table S3.** Pairwise comparisons of estimated least-squares means among all measurement group combinations from NP-MANOVA with RRPP (see text for statistical details). d is the distance between means in multivariate space (effect size of difference). Significant differences shown in bold with one ( $P < 0.05$ ), two ( $P < 0.01$ ), or three ( $P < 0.001$ ) asterisks.

| Comparison      | d            | 95% CL       | Z            | Pr > d         |
|-----------------|--------------|--------------|--------------|----------------|
| L-L-T1:L-L-T2   | <b>2.388</b> | <b>2.103</b> | <b>2.555</b> | <b>0.013*</b>  |
| L-L-T1:L-EH-T2  | 2.082        | 2.101        | 1.741        | 0.057          |
| L-L-T1:H-H-T1   | 1.475        | 1.753        | 0.835        | 0.188          |
| L-L-T1:H-H-T2   | <b>2.582</b> | <b>2.170</b> | <b>2.885</b> | <b>0.01*</b>   |
| L-L-T1:H-EH-T2  | <b>2.374</b> | <b>2.210</b> | <b>2.093</b> | <b>0.024*</b>  |
| L-L-T2:L-EH-T2  | <b>2.431</b> | <b>2.417</b> | <b>1.770</b> | <b>0.046*</b>  |
| L-L-T2:H-H-T1   | <b>2.793</b> | <b>2.156</b> | <b>3.431</b> | <b>0.002**</b> |
| L-L-T2:H-H-T2   | 1.936        | 2.414        | 0.618        | 0.268          |
| L-L-T2:H-EH-T2  | 2.670        | 2.587        | 1.969        | <b>0.037*</b>  |
| L-EH-T2:H-H-T1  | 2.026        | 2.155        | 1.434        | 0.09           |
| L-EH-T2:H-H-T2  | 2.392        | 2.404        | 1.698        | 0.055          |
| L-EH-T2:H-EH-T2 | 2.016        | 2.558        | 0.552        | 0.273          |
| H-H-T1:H-H-T2   | <b>2.710</b> | <b>2.125</b> | <b>3.343</b> | <b>0.003*</b>  |
| H-H-T1:H-EH-T2  | 1.700        | 2.258        | 0.253        | 0.398          |
| H-H-T2:H-EH-T2  | 2.257        | 2.604        | 1.035        | 0.146          |

L-L-T1: Low-elevation lizards measured at low elevation at first timepoint; L-L-T2: Low-elevation lizards measured at low elevation at second timepoint; L-EH-T2: Low-elevation lizards measured at extreme high elevation at second timepoint; H-H-T1: High-elevation lizards measured at high elevation at first timepoint; H-H-T2: High-elevation lizards measured at high elevation at second timepoint; H-EH-T2: High-elevation lizards measured at extreme high elevation at second timepoint

**Table S4.** Least-squares means and 95% confidence limits for individual treats for each measurement group of adult male *Podarcis muralis* lizards. T<sub>PREF</sub>, thermal preference; T<sub>SEL</sub>, selected thermal range; CT<sub>MIN</sub>, critical thermal minimum; CT<sub>MAX</sub>, critical thermal maximum; Hct, haematocrit; [Hb], blood haemoglobin concentration; Endurance, running endurance; RMR, resting metabolic rate ( $\dot{V}\text{CO}_2$ ); MMR, maximal post-exhaustion metabolic rate ( $\dot{V}\text{CO}_{2\text{PEAK}}$ ).

| Group   | Trait             | Lower 95% CL | LSmean | Upper 95% CL |
|---------|-------------------|--------------|--------|--------------|
| H-EH-T2 | CT <sub>MAX</sub> | -0.371       | 0.400  | 1.161        |
| H-EH-T2 | CT <sub>MIN</sub> | -1.503       | -0.812 | -0.057       |
| H-EH-T2 | Endurance         | -0.660       | 0.100  | 0.786        |
| H-EH-T2 | [Hb]              | -1.098       | -0.319 | 0.471        |
| H-EH-T2 | Hct               | -0.625       | -0.058 | 0.567        |
| H-EH-T2 | T <sub>PREF</sub> | -0.733       | 0.139  | 0.871        |
| H-EH-T2 | T <sub>SEL</sub>  | 0.108        | 0.831  | 1.638        |
| H-EH-T2 | MMR               | -1.469       | -0.775 | -0.075       |
| H-EH-T2 | RMR               | -0.920       | -0.149 | 0.631        |
| H-H-T1  | CT <sub>MAX</sub> | -0.292       | 0.229  | 0.746        |
| H-H-T1  | CT <sub>MIN</sub> | -0.362       | 0.182  | 0.722        |
| H-H-T1  | Endurance         | 0.292        | 0.754  | 1.266        |
| H-H-T1  | [Hb]              | -0.485       | 0.052  | 0.616        |
| H-H-T1  | Hct               | 0.262        | 0.661  | 1.061        |
| H-H-T1  | T <sub>PREF</sub> | -0.700       | -0.109 | 0.393        |
| H-H-T1  | T <sub>SEL</sub>  | -0.405       | 0.105  | 0.684        |
| H-H-T1  | MMR               | -0.880       | -0.379 | 0.107        |
| H-H-T1  | RMR               | -0.848       | -0.312 | 0.220        |
| H-H-T2  | CT <sub>MAX</sub> | -0.665       | 0.121  | 0.820        |
| H-H-T2  | CT <sub>MIN</sub> | -0.309       | 0.345  | 1.074        |
| H-H-T2  | Endurance         | -1.640       | -0.982 | -0.338       |
| H-H-T2  | [Hb]              | -0.880       | -0.185 | 0.561        |
| H-H-T2  | Hct               | -1.807       | -1.293 | -0.713       |
| H-H-T2  | T <sub>PREF</sub> | -0.306       | 0.528  | 1.187        |
| H-H-T2  | T <sub>SEL</sub>  | -0.713       | -0.025 | 0.752        |
| H-H-T2  | MMR               | -1.099       | -0.416 | 0.216        |
| H-H-T2  | RMR               | -0.834       | -0.114 | 0.616        |
| L-EH-T2 | CT <sub>MAX</sub> | -1.633       | -0.912 | -0.228       |
| L-EH-T2 | CT <sub>MIN</sub> | -1.205       | -0.518 | 0.229        |
| L-EH-T2 | Endurance         | -0.951       | -0.296 | 0.394        |
| L-EH-T2 | [Hb]              | 0.086        | 0.824  | 1.580        |
| L-EH-T2 | Hct               | -0.421       | 0.116  | 0.677        |
| L-EH-T2 | T <sub>PREF</sub> | -0.633       | 0.156  | 0.811        |
| L-EH-T2 | T <sub>SEL</sub>  | -0.513       | 0.189  | 0.934        |
| L-EH-T2 | MMR               | -0.909       | -0.245 | 0.416        |
| L-EH-T2 | RMR               | -0.388       | 0.262  | 0.993        |
| L-L-T1  | CT <sub>MAX</sub> | -0.441       | 0.080  | 0.579        |
| L-L-T1  | CT <sub>MIN</sub> | -0.147       | 0.361  | 0.903        |

|        |                   |        |        |        |
|--------|-------------------|--------|--------|--------|
| L-L-T1 | Endurance         | -0.479 | -0.017 | 0.441  |
| L-L-T1 | [Hb]              | -0.476 | 0.044  | 0.557  |
| L-L-T1 | Hct               | 0.103  | 0.494  | 0.896  |
| L-L-T1 | T <sub>PREF</sub> | -1.121 | -0.558 | -0.069 |
| L-L-T1 | T <sub>SEL</sub>  | -0.667 | -0.197 | 0.335  |
| L-L-T1 | MMR               | 0.237  | 0.698  | 1.149  |
| L-L-T1 | RMR               | -0.704 | -0.199 | 0.345  |
| L-L-T2 | CT <sub>MAX</sub> | -0.924 | -0.144 | 0.608  |
| L-L-T2 | CT <sub>MIN</sub> | -0.889 | -0.191 | 0.523  |
| L-L-T2 | Endurance         | -0.894 | -0.212 | 0.443  |
| L-L-T2 | [Hb]              | -1.275 | -0.561 | 0.141  |
| L-L-T2 | Hct               | -1.501 | -0.976 | -0.407 |
| L-L-T2 | T <sub>PREF</sub> | -0.178 | 0.582  | 1.200  |
| L-L-T2 | T <sub>SEL</sub>  | -1.385 | -0.692 | 0.073  |
| L-L-T2 | MMR               | -0.097 | 0.583  | 1.212  |
| L-L-T2 | RMR               | 0.271  | 0.961  | 1.667  |

L-L-T1: Low-elevation lizards measured at low elevation at first timepoint; L-L-T2: Low-elevation lizards measured at low elevation at second timepoint; L-EH-T2: Low-elevation lizards measured at extreme high elevation at second timepoint; H-H-T1: High-elevation lizards measured at high elevation at first timepoint; H-H-T2: High-elevation lizards measured at high elevation at second timepoint; H-EH-T2: High-elevation lizards measured at extreme high elevation at second timepoint

**Table S5.** Thermoregulatory behavior does not differ between low and high populations. Field collected data that includes the daily mean minimum and maximum ambient temperatures at two locations within each study site measured every 10 minutes during the month of September. Temperatures were measured 1 meter above the ground. The mean operative temperature ( $T_e$ ), mean minimum and maximum  $T_e$  calculations are given. Thermoregulatory efficiency (E) and confidence intervals. Mean field measured body temperature ( $T_b$ ), and minimum and maximum  $T_b$  measured.

| Site                                | Low Elevation       | High Elevation      |
|-------------------------------------|---------------------|---------------------|
| Field Mean Minimum Temperature (°C) | 14.17               | 9.5                 |
| Field Mean Maximum Temperature (°C) | 28.42               | 27.17               |
| Mean $T_e$ (°C)                     | 29.21               | 24.25               |
| Mean Minimum $T_e$ (°C)             | 15.91               | 13.57               |
| Mean Maximum $T_e$ (°C)             | 49.78               | 43.16               |
| Mean de                             | 6.48                | 6.33                |
| Mean db                             | 1.18                | 1.47                |
| E (CI)                              | 0.82<br>(0.75-0.88) | 0.77<br>(0.69-0.83) |
| Mean Field $T_b$ (± SE) (°C)        | 32.53±0.36          | 29.92±0.34          |
| $T_b$ Range (°C)                    | 19.90 – 38.10       | 17.40 – 36.90       |

NOTE:  $T_e$  and  $T_b$  measurements for each location were only measured for one day, therefore we cannot account for weather and seasonal variation and season variation between sites.
